# Supplementary material for: Pesticides and transformation products in surface waters of western Montérégie, Canada: occurrence, spatial distribution and ecotoxicological risks
Source: Royal Society of Chemistry journal article supplement (doi:10.1039/d3va00231d), 2024-01-01
Supplement: d3va00231d1.pdf [file d3va00231d1.pdf]

## Supporting information

### **Pesticides and transformation products in surface waters of western Montérégie, Canada: Occurrence, spatial distribution and ecotoxicological risks**

Xiameng Feng<sup>a</sup>, Zhen Liu<sup>b</sup>, Sung Vo Duy<sup>a</sup>, Gabriel Munoz<sup>a</sup>, Lise Parent<sup>c</sup>, Sébastien Sauvé<sup>a</sup>

<sup>a</sup> Department of Chemistry, Université de Montréal, Montréal, QC H2V 0B3, Canada

<sup>b</sup> Industrial Chair on Drinking Water, Department of Civil, Mining and Geological Engineering,  
Polytechnique Montréal, Montréal, QC H3T 1J4, Canada

<sup>c</sup> Department of Science and Technology, Université TÉLUQ, Montréal, QC H2S 3L5, Canada

\*Corresponding author: [sebastien.sauve@umontreal.ca](mailto:sebastien.sauve@umontreal.ca)

## Table of Contents

|                                                                                              |           |
|----------------------------------------------------------------------------------------------|-----------|
| <i>Section S1 Classification of pesticides .....</i>                                         | <i>3</i>  |
| <i>Section S2 Chemical standards and other materials.....</i>                                | <i>5</i>  |
| <i>Section S3 Study area and sampling coordinates .....</i>                                  | <i>10</i> |
| <i>Section S4 Filter selection .....</i>                                                     | <i>12</i> |
| <i>Section S5 Instrument parameters .....</i>                                                | <i>16</i> |
| <i>Section S6 Method validation .....</i>                                                    | <i>21</i> |
| <i>Section S7 Absolute extraction efficiency evaluation.....</i>                             | <i>24</i> |
| <i>Section S8 Determination of method limit of detection .....</i>                           | <i>27</i> |
| <i>Section S9 Quebec’s water quality criteria for the protection of aquatic life.....</i>    | <i>30</i> |
| <i>Section S10 Occurrence of pesticides in the surface water of western Montérégie .....</i> | <i>31</i> |
| <i>Section S11 Pesticide sales in Quebec .....</i>                                           | <i>33</i> |
| <i>Section S12 Flowrate estimation for the watersheds in western Montérégie .....</i>        | <i>35</i> |
| <i>Figure S1 .....</i>                                                                       | <i>36</i> |
| <i>Figure S2 .....</i>                                                                       | <i>37</i> |
| <i>Figure S3 .....</i>                                                                       | <i>38</i> |
| <i>Figure S4 .....</i>                                                                       | <i>39</i> |
| <i>Figure S5 .....</i>                                                                       | <i>40</i> |
| <i>Figure S6 .....</i>                                                                       | <i>41</i> |
| <i>References.....</i>                                                                       | <i>42</i> |

## Section S1 Classification of pesticides

**Table S1** Details on pesticide types, treatment methods, and modes of action.

| Compounds                                  | Types       | Treatment           | Modes of action                                                  |
|--------------------------------------------|-------------|---------------------|------------------------------------------------------------------|
| 2,4-dichlorophenoxyacetic acid (2,4-D)     | Herbicide   | Foliage             | Growth regulator, auxin mimic                                    |
| 4-chloro-2-methylphenoxyacetic acid (MCPA) | Herbicide   | Foliage, soil       | Growth regulator, auxin mimic                                    |
| Acetamiprid                                | Insecticide | Foliage, seed, soil | Systemic, nicotinic agonist                                      |
| Alachlor                                   | Herbicide   | Soil, foliage       | Growth regulator, biosynthetic inhibition                        |
| Atrazine                                   | Herbicide   | Soil, foliage       | Systemic, photosystem inhibition                                 |
| Azoxystrobin                               | Fungicide   | Foliage, seed       | Systemic, respiratory inhibition                                 |
| Bentazon                                   | Herbicide   | Foliage             | Contact, photosystem inhibition                                  |
| Bromoxynil                                 | Herbicide   | Foliage             | Both contact and systemic, photosystem inhibition                |
| Carbaryl                                   | Insecticide | Foliage             | Contact, acetylcholinesterase inhibition                         |
| Carbendazim                                | Fungicide   | Foliage, seed       | Systemic, cell division inhibition                               |
| Chlorantraniliprole                        | Insecticide | Foliage, soil       | Systemic, ryanodine receptor activation                          |
| Chlorothalonil                             | Fungicide   | Foliage             | Non-systemic, metabolic inhibition                               |
| Chlorpyrifos                               | Insecticide | Foliage             | Contact, acetylcholinesterase inhibition                         |
| Clothianidin                               | Insecticide | Seed, soil, foliage | Systemic, nicotinic agonist                                      |
| Cyanazine                                  | Herbicide   | Soil, foliage       | Systemic, photosystem inhibition                                 |
| Dicamba                                    | Herbicide   | Foliage             | Systemic, auxin mimic                                            |
| Dimethenamid                               | Herbicide   | Soil                | Contact, cell division inhibition                                |
| Dinotefuran                                | Insecticide | Foliage, soil       | Systemic, nicotinic agonist                                      |
| Fipronil                                   | Insecticide | Soil, seed          | Both contact and ingestion, GABAA-gated chloride channel blocker |
| Fonicamid                                  | Insecticide | Foliage             | Both contact and ingestion, feeding behaviour inhibition         |
| Fluazinam                                  | Fungicide   | Foliage, soil       | Protectant, energy production disruption                         |
| Flumetsulam                                | Herbicide   | Soil                | Systemic, acetolactate synthase inhibition                       |
| Fluxapyroxad                               | Fungicide   | Foliage, seed       | Systemic, succinate dehydrogenase inhibition                     |
| Fomesafen                                  | Herbicide   | Soil                | Contact, protoporphyrinogen oxidase inhibition                   |
| Glufosinate                                | Herbicide   | Foliage             | Contact, glutamine synthetase inhibition                         |
| Glyphosate                                 | Herbicide   | Foliage, soil       | Systemic, EPSP synthase inhibition                               |
| Hexazinone                                 | Herbicide   | Soil, foliage       | Systemic, photosynthesis inhibition                              |
| Imazethapyr                                | Herbicide   | Foliage, soil, seed | Systemic, acetolactate synthase inhibition                       |
| Imidacloprid                               | Insecticide | Soil, seed          | Systemic, neurotransmission blocker                              |
| Linuron                                    | Herbicide   | Foliage, soil       | Systemic, photosystem II inhibition                              |
| Mecoprop                                   | Herbicide   | Foliage, soil       | Systemic, auxin mimic                                            |
| Mesotrione                                 | Herbicide   | Foliage, seed       | Systemic, 4-hydroxyphenylpyruvate dioxygenase (HPPD) inhibition  |
| Metconazole                                | Fungicide   | Foliage, seed       | Systemic, ergosterol biosynthesis inhibition                     |
| Metribuzin                                 | Herbicide   | Foliage, soil       | Systemic, photosystem II inhibition                              |
| Nicosulfuron                               | Herbicide   | Foliage, soil       | Systemic, acetolactate synthase inhibition                       |
| Nitenpyram                                 | Insecticide | Foliage, seed       | Systemic, neurotransmission blocker                              |
| Pendimethalin                              | Herbicide   | Soil                | Systemic, cell division inhibition                               |
| Prometryn                                  | Herbicide   | Foliage, soil       | Systemic, photosystem II inhibition                              |
| Propiconazole                              | Fungicide   | Foliage, seed       | Systemic, 14- $\alpha$ -sterol demethylase inhibition            |
| Pyrimethanil                               | Fungicide   | Foliage, fruit      | Systemic, biosynthesis of methionine inhibition                  |
| Simazine                                   | Herbicide   | Foliage, soil       | Systemic, photosystem II inhibition                              |

|                              |             |                     |                                                                 |
|------------------------------|-------------|---------------------|-----------------------------------------------------------------|
| (S)-Metolachlor              | Herbicide   | Soil, seed          | Systemic, synthesis of long chain fatty acids inhibition        |
| Tebuconazole                 | Fungicide   | Foliage, seed       | Systemic, demethylation inhibition                              |
| Thiacloprid                  | Insecticide | Foliage, soil, seed | Systemic, nicotinic acetylcholine receptor agonist              |
| Thiamethoxam                 | Insecticide | Foliage, seed       | Systemic, nicotinic acetylcholine receptor agonist              |
| Topramezone                  | Herbicide   | Foliage, soil       | Systemic, HPPD (4-hydroxyphenylpyruvate dioxygenase) inhibition |
| Triclopyr                    | Herbicide   | Foliage, stem       | Systemic, auxin mimic                                           |
| Triclopyr 2-butoxyethylester | Herbicide   | Foliage, stem       | Systemic, auxin mimic                                           |

---

## Section S2 Chemical standards and other materials

**Table S2** Details on chemical standards and other materials used in the present study.

| Chemicals/materials                                                       | Purity  | Supplier |
|---------------------------------------------------------------------------|---------|----------|
| 2,4-dichlorophenoxyacetic acid                                            | ≥ 98%   |          |
| 3,5,6-trichloro-2-pyridinol                                               | ≥ 98%   |          |
| 4-chloro-2-methylphenoxyacetic acid                                       | ≥ 99.8% |          |
| Acetamiprid                                                               | ≥ 99.9% |          |
| Alachlor                                                                  | ≥98%    |          |
| Aminomethylphosphonic acid                                                | ≥ 99%   |          |
| Atrazine                                                                  | ≥ 98.8% |          |
| Atrazine-2-hydroxy                                                        | ≥ 99%   |          |
| Azoxystrobin                                                              | ≥ 98%   |          |
| Bentazon                                                                  | ≥ 99.9% |          |
| Bromoxynil                                                                | ≥ 98%   |          |
| Chlorantraniliprole                                                       | ≥ 98%   |          |
| Carbaryl                                                                  | ≥ 98%   |          |
| Carbendazim                                                               | ≥ 98%   |          |
| Chlorothalonil                                                            | ≥ 98%   |          |
| Chlorpyrifos                                                              | ≥ 98%   |          |
| Clothianidin                                                              | ≥ 98%   |          |
| Cyanazine                                                                 | ≥ 99.8% |          |
| Desethylatrazine                                                          | ≥ 97%   |          |
| Desisopropylatrazine                                                      | ≥ 96.3% |          |
| Dicamba                                                                   | ≥ 98%   |          |
| Dimethenamid                                                              | ≥98%    |          |
| Dinotefuran                                                               | ≥ 98%   |          |
| Desnitro-imidacloprid                                                     | ≥ 99%   |          |
| Fipronil                                                                  | ≥ 95%   |          |
| Flonicamid                                                                | ≥ 95%   |          |
| Fluazinam                                                                 | ≥ 98%   |          |
| Fluxapyroxad                                                              | ≥ 99.9% |          |
| Glufosinate                                                               | ≥ 98%   |          |
| Glyphosate                                                                | ≥ 99.7% |          |
| Hexazinone                                                                | ≥ 99%   |          |
| Imidacloprid                                                              | ≥ 99.9% |          |
| Linuron                                                                   | ≥ 99.7% |          |
| Mecoprop                                                                  | ≥ 98%   |          |
| Mesotrione                                                                | ≥ 98%   |          |
| Metconazole                                                               | ≥ 98.9% |          |
| (S)-metolachlor                                                           | ≥ 98.4% |          |
| Metolachlor ethanesulfonic acid                                           | ≥ 98%   |          |
| Metolachlor oxanilic acid                                                 | ≥ 98%   |          |
| Metribuzin                                                                | ≥ 99.7% |          |
| Nitenpyram                                                                | ≥ 98%   |          |
| Pendimethalin                                                             | ≥ 98%   |          |
| Prometryn                                                                 | ≥ 99.4% |          |
| Propiconazole                                                             | ≥ 99%   |          |
| Pyrimethanil                                                              | ≥ 99.2% |          |
| Simazine                                                                  | ≥ 99.9% |          |
| Triclopyr                                                                 | ≥ 98%   |          |
| Triclopyr 2-butoxyethylester                                              | ≥ 95%   |          |
| Tebuconazole                                                              | ≥ 98%   |          |
| Thiacloprid                                                               | ≥ 98%   |          |
| Thiamethoxam                                                              | ≥ 98%   |          |
| Topramezone                                                               | ≥ 98%   |          |
| Acetamiprid-d <sub>3</sub>                                                | ≥ 98%   |          |
| Aminomethylphosphonic acid- <sup>13</sup> C <sup>15</sup> Nd <sub>2</sub> | ≥ 98%   |          |
| Clothianidin-d <sub>3</sub>                                               | ≥ 97%   |          |

Sigma Aldrich (St. Louis, MO, USA)

|                                                                                  |         |                                                               |
|----------------------------------------------------------------------------------|---------|---------------------------------------------------------------|
| Dicamba-d <sub>3</sub>                                                           | ≥ 98%   |                                                               |
| Glyphosate- <sup>13</sup> C <sub>2</sub> <sup>15</sup> N                         | ≥ 98%   |                                                               |
| Imidacloprid-d <sub>4</sub>                                                      | ≥ 99%   |                                                               |
| Nicosulfuron-d <sub>6</sub>                                                      | ≥ 98%   |                                                               |
| Tebuconazole-d <sub>9</sub>                                                      | ≥ 98%   |                                                               |
| Thiamethoxam-d <sub>3</sub>                                                      | ≥ 98%   |                                                               |
| Flumetsulam                                                                      | ≥ 98%   |                                                               |
| Fomesafen                                                                        | ≥ 98%   |                                                               |
| Imazethapyr                                                                      | ≥ 98%   |                                                               |
| Nicosulfuron                                                                     | ≥ 98%   |                                                               |
| 2,4-dichlorophenoxyacetic acid- <sup>13</sup> C <sub>6</sub>                     | ≥ 98%   |                                                               |
| Atrazine-2-hydroxy-d <sub>5</sub>                                                | ≥ 98%   | Toronto Research Chemicals Inc.<br>(North York, ON, Canada)   |
| Chlorantraniliprole-d <sub>6</sub>                                               | ≥ 98%   |                                                               |
| Dimethenamid-d <sub>3</sub>                                                      | ≥ 98%   |                                                               |
| Metolachlor-d <sub>6</sub>                                                       | ≥ 98%   |                                                               |
| Carbaryl-d <sub>7</sub>                                                          | ≥ 98%   |                                                               |
| Metolachlor ethanesulfonic acid-d <sub>6</sub>                                   | ≥ 98%   |                                                               |
| Propiconazole-d <sub>7</sub>                                                     | ≥ 98%   |                                                               |
| Pyrimethanil-d <sub>5</sub>                                                      | ≥ 98%   |                                                               |
| Atrazine- <sup>13</sup> C <sub>3</sub>                                           | ≥ 99%   | Cambridge Isotope Laboratories, Inc.<br>(Andover, MA, U.S.A.) |
| Deethylatrazine- <sup>13</sup> C <sub>3</sub>                                    | ≥ 99%   |                                                               |
| Fipronil- <sup>13</sup> C <sub>2</sub> <sup>15</sup> N <sub>2</sub>              | ≥ 98%   | Santa Cruz Biotechnology (Dallas, TX,<br>USA)                 |
| Linuron-d <sub>6</sub>                                                           | ≥ 98%   |                                                               |
| LC-MS grade HPLC-water                                                           | -       |                                                               |
| Methanol (MeOH)                                                                  | -       | Fisher Scientific (Whitby, ON, Canada)                        |
| Acetonitrile (ACN)                                                               | -       |                                                               |
| Ammonium acetate                                                                 | ≥ 97%   |                                                               |
| Ammonium fluoride                                                                | ≥ 98%   |                                                               |
| Formic acid                                                                      | ≥ 95%   |                                                               |
| Hydrochloric acid                                                                | ≥ 37%   | Sigma Aldrich (St. Louis, MO, U.S.A.)                         |
| Sodium citrate dibasic sesquihydrate                                             | ≥ 99%   |                                                               |
| Sodium tetraborate decahydrate                                                   | ≥ 99.5% |                                                               |
| 9-fluorenylmethyl chloroformate                                                  | ≥ 98%   | Fisher Scientific                                             |
| Nitrogen (N <sub>2</sub> )                                                       | 99.998% | MEGS Inc. (St-Laurent, Quebec,<br>Canada)                     |
| Strata <sup>tm</sup> -X Polymeric Reversed Phase SPE<br>cartridges (200 mg/6 ml) | -       | Phenomenex (Torrance, CA, U.S.A.)                             |
| Regenerated cellulose filters (0.45µm, 47 mm<br>diameter)                        |         | Sartorius Stedim Biotech (Göttingen,<br>Germany)              |
| Regenerated cellulose syringe filters (0.2 µm, 15<br>mm diameter)                |         |                                                               |
| Regenerated cellulose syringe filters (0.2 µm, 4 mm<br>diameter)                 |         | Thermo Fisher Scientific (Rockwood,<br>TN, USA)               |

**Table S3** Details on surrogate isotope-labelled internal standards (ILIS).

| <b>Internal standards</b>                                                 | <b>Abbreviation</b>                                              | <b>Theoretical <i>m/z</i></b> |
|---------------------------------------------------------------------------|------------------------------------------------------------------|-------------------------------|
| 2,4-D- <sup>13</sup> C <sub>6</sub>                                       | 24D- <sup>13</sup> C <sub>6</sub>                                | 224.97985                     |
| Acetamidrid-d <sub>3</sub>                                                | Aceta-d <sub>3</sub>                                             | 226.09333                     |
| Aminomethylphosphonic acid- <sup>13</sup> C <sup>15</sup> Nd <sub>2</sub> | AMPA- <sup>13</sup> C <sup>15</sup> Nd <sub>2</sub>              | 338.09574                     |
| Atrazine- <sup>13</sup> C <sub>3</sub>                                    | ATZ- <sup>13</sup> C <sub>3</sub>                                | 219.10948                     |
| Atrazine-2-hydroxy-d <sub>5</sub>                                         | ATZ-OH-d <sub>5</sub>                                            | 203.16632                     |
| Chlorantraniliprole-d <sub>6</sub>                                        | CAP-d <sub>6</sub>                                               | 488.01572                     |
| Carbaryl-d <sub>7</sub>                                                   | Carba-d <sub>7</sub>                                             | 209.13019                     |
| Clothianidin-d <sub>3</sub>                                               | Clothia-d <sub>3</sub>                                           | 251.01917                     |
| Deethylatrazine- <sup>13</sup> C <sub>3</sub>                             | DEA- <sup>13</sup> C <sub>3</sub>                                | 191.07818                     |
| Dicamba-d <sub>3</sub>                                                    | Dicam-d <sub>3</sub>                                             | 221.97986                     |
| Dimethenamid-d <sub>3</sub>                                               | Dime-d <sub>3</sub>                                              | 279.10078                     |
| Fipronil- <sup>13</sup> C <sub>2</sub> <sup>15</sup> N <sub>2</sub>       | Fipro- <sup>13</sup> C <sub>2</sub> <sup>15</sup> N <sub>2</sub> | 438.92892                     |
| Glyphosate- <sup>13</sup> C <sub>2</sub> <sup>15</sup> N                  | Gly- <sup>13</sup> C <sub>2</sub> <sup>15</sup> N                | 395.09147                     |
| Imidacloprid-d <sub>4</sub>                                               | Imida-d <sub>4</sub>                                             | 260.08468                     |
| Linuron-d <sub>6</sub>                                                    | Linu-d <sub>6</sub>                                              | 255.05687                     |
| Metolachlor-d <sub>6</sub>                                                | Meto-d <sub>6</sub>                                              | 290.17884                     |
| Metolachlor ESA-d <sub>6</sub>                                            | Meto ESA-d <sub>6</sub>                                          | 334.15898                     |
| Nicosulfuron-d <sub>6</sub>                                               | Nico-d <sub>6</sub>                                              | 417.14579                     |
| Propiconazole-d <sub>7</sub>                                              | Propico-d <sub>7</sub>                                           | 349.12099                     |
| Pyrimethanil-d <sub>5</sub>                                               | Pyrime-d <sub>5</sub>                                            | 205.14960                     |
| Tebuconazole-d <sub>9</sub>                                               | Tebuco-d <sub>9</sub>                                            | 317.20890                     |
| Thiamethoxam-d <sub>3</sub>                                               | Thiame-d <sub>3</sub>                                            | 295.04539                     |

**Table S4** Details on target pesticide names, abbreviation, analyzed ion formula, theoretical *m/z*, and associated ILIS.

| Compounds                           | Abbreviation | Ion formula                    | Theoretical <i>m/z</i> | Associated ILIS                                                     |
|-------------------------------------|--------------|--------------------------------|------------------------|---------------------------------------------------------------------|
| 2,4-Dichlorophenoxyacetic acid      | 2,4-D        | [C8H5Cl2O3] <sup>-</sup>       | 218.96103              | 2,4-D- <sup>13</sup> C <sub>6</sub>                                 |
| 3,5,6-Trichloro-2-pyridinol         | TCP          | [C5HCl3NO] <sup>-</sup>        | 195.91182              | 2,4-D- <sup>13</sup> C <sub>6</sub>                                 |
| 4-chloro-2-methylphenoxyacetic acid | MCPA         | [C9H8ClO3] <sup>-</sup>        | 199.01565              | 2,4-D- <sup>13</sup> C <sub>6</sub>                                 |
| Acetamiprid                         | Aceta        | [C10H12ClN4] <sup>+</sup>      | 223.07450              | Acetamiprid-d <sub>3</sub>                                          |
| Alachlor                            | Alacl        | [C14H21ClNO2] <sup>+</sup>     | 270.12553              | Metolachlor-d <sub>6</sub>                                          |
| Aminomethylphosphonic acid          | AMPA         | [CH7NO3P-FMOC] <sup>+</sup>    | 334.08389              | AMPA- <sup>13</sup> C <sup>15</sup> Nd <sub>2</sub>                 |
| Atrazine                            | ATZ          | [C8H15ClN5] <sup>+</sup>       | 216.10105              | Atrazine- <sup>13</sup> C <sub>3</sub>                              |
| Atrazine-2-hydroxy                  | ATZ-OH       | [C8H16N5O] <sup>+</sup>        | 198.13494              | Atrazine-2-hydroxy-d <sub>5</sub>                                   |
| Azoxystrobin                        | Azoxy        | [C22H18N3O5] <sup>+</sup>      | 404.12409              | Pyrimethanyl-d <sub>5</sub>                                         |
| Bentazon                            | Benta        | [C10H11N2O3S] <sup>-</sup>     | 239.04849              | 2,4-D- <sup>13</sup> C <sub>6</sub>                                 |
| Bromoxynil                          | Bromo        | [C7H2Br2NO] <sup>-</sup>       | 275.84772              | 2,4-D- <sup>13</sup> C <sub>6</sub>                                 |
| Chlorantraniliprole                 | CAP          | [C18H15BrCl2N5O2] <sup>+</sup> | 481.97807              | Chlorantraniliprole-d <sub>6</sub>                                  |
| Carbaryl                            | Carba        | [C12H12NO2] <sup>+</sup>       | 202.08625              | Carbaryl-d <sub>7</sub>                                             |
| Carbendazim                         | Carben       | [C9H10N3O2] <sup>+</sup>       | 192.07675              | Acetamiprid-d <sub>3</sub>                                          |
| Chlorothalonil                      | Chloro       | [C8Cl3N2O] <sup>-</sup>        | 244.90707              | Fipronil- <sup>13</sup> C <sub>2</sub> <sup>15</sup> N <sub>2</sub> |
| Chlorpyrifos                        | Chlorpy      | [C9H12Cl3NO3PS] <sup>+</sup>   | 349.93356              | Propiconazole-d <sub>7</sub>                                        |
| Clothianidin                        | Clothia      | [C6H7ClN5O2S] <sup>-</sup>     | 248.00035              | Clothianidin-d <sub>3</sub>                                         |
| Cyanazine                           | Cyana        | [C9H14ClN6] <sup>+</sup>       | 241.09630              | Atrazine- <sup>13</sup> C <sub>3</sub>                              |
| Desethylatrazine                    | DEA          | [C6H11ClN5] <sup>+</sup>       | 188.06975              | Desethylatrazine- <sup>13</sup> C <sub>3</sub>                      |
| Desisopropylatrazine                | DIA          | [C5H9ClN5] <sup>+</sup>        | 174.05410              | Desethylatrazine- <sup>13</sup> C <sub>3</sub>                      |
| Dicamba                             | Dicam        | [C8H5Cl2O3] <sup>-</sup>       | 218.96103              | Dicamba-D3                                                          |
| Dimethenamid                        | Dimet        | [C12H19ClNO2S] <sup>+</sup>    | 276.08195              | Dimethenamid-d <sub>3</sub>                                         |
| Dinotefuran                         | Dinote       | [C7H13N4O3] <sup>-</sup>       | 201.09821              | Clothianidin-d <sub>3</sub>                                         |
| Desnitro-imidacloprid               | DN-Imi       | [C9H12ClN4] <sup>+</sup>       | 211.07450              | Thiamethoxam-d <sub>3</sub>                                         |
| Fipronil                            | Fipro        | [C12H3Cl2F6N4OS] <sup>-</sup>  | 434.93033              | Fipronil- <sup>13</sup> C <sub>2</sub> <sup>15</sup> N <sub>2</sub> |
| Flonicamid                          | Flonica      | [C9H5F3N3O] <sup>-</sup>       | 228.03792              | 2,4-D- <sup>13</sup> C <sub>6</sub>                                 |
| Fluazinam                           | Fluaz        | [C13H3Cl2F6N4O4] <sup>-</sup>  | 462.94300              | Fipronil- <sup>13</sup> C <sub>2</sub> <sup>15</sup> N <sub>2</sub> |
| Flumetsulam                         | Flume        | [C12H10F2N5O2S] <sup>+</sup>   | 326.05178              | Imidacloprid-d <sub>4</sub>                                         |
| Fluxapyroxad                        | Fluxa        | [C18H13F5N3O] <sup>+</sup>     | 382.09733              | Pyrimethanyl-d <sub>5</sub>                                         |



|                                 |          |                               |           |                                                                     |
|---------------------------------|----------|-------------------------------|-----------|---------------------------------------------------------------------|
| Fomesafen                       | Fomesa   | [C15H9ClF3N2O6S] <sup>-</sup> | 436.98165 | Fipronil- <sup>13</sup> C <sub>2</sub> <sup>15</sup> N <sub>2</sub> |
| Glufosinate                     | Gly      | [C5H13NO4P-FMOC] <sup>+</sup> | 404.12575 | Glyphosate- <sup>13</sup> C <sub>2</sub> <sup>15</sup> N            |
| Glyphosate                      | Glu      | [C3H9PNO5-FMOC] <sup>+</sup>  | 392.08936 | Glyphosate- <sup>13</sup> C <sub>2</sub> <sup>15</sup> N            |
| Hexazinone                      | HXZ      | [C12H21N4O2] <sup>+</sup>     | 253.16590 | Atrazine- <sup>13</sup> C <sub>3</sub>                              |
| Imazethapyr                     | Imaze    | [C15H20N3O3] <sup>+</sup>     | 290.14992 | Acetamiprid-d <sub>3</sub>                                          |
| Imidacloprid                    | Imida    | [C9H11ClN5O2] <sup>+</sup>    | 256.05958 | Imidacloprid-d <sub>4</sub>                                         |
| Linuron                         | Linu     | [C9H11Cl2N2O2] <sup>+</sup>   | 249.01921 | Linuron-d <sub>6</sub>                                              |
| Mecoprop                        | Mecop    | [C10H10ClO3] <sup>-</sup>     | 213.03130 | 2,4-D- <sup>13</sup> C <sub>6</sub>                                 |
| Mesotrione                      | Meso     | [C14H14NO7S] <sup>+</sup>     | 340.04855 | Thiamethoxam-d <sub>3</sub>                                         |
| Metconazole                     | Metco    | [C17H23ClN3O] <sup>+</sup>    | 320.15242 | Propiconazole-d <sub>7</sub>                                        |
| Metolachlor ethanesulfonic acid | Meto-ESA | [C15H22NO5S] <sup>-</sup>     | 328.12132 | Metolachlor ESA-d <sub>6</sub>                                      |
| Metolachlor oxanilic acid       | Meto-OA  | [C15H20NO4] <sup>-</sup>      | 278.13868 | Metolachlor ESA-d <sub>6</sub>                                      |
| Metribuzin                      | Metri    | [C8H14N4OS] <sup>+</sup>      | 215.09611 | Atrazine- <sup>13</sup> C <sub>3</sub>                              |
| Nicosulfuron                    | Nico     | [C15H19N6O6S] <sup>+</sup>    | 411.10813 | Nicosulfuron-d <sub>6</sub>                                         |
| Nitenpyram                      | Niten    | [C11H16ClN4O2] <sup>+</sup>   | 271.09563 | Thiamethoxam-d <sub>3</sub>                                         |
| Pendimethalin                   | Pendi    | [C13H20N3O4] <sup>+</sup>     | 282.14483 | Propiconazole-d <sub>7</sub>                                        |
| Prometryn                       | Prome    | [C10H20N5S] <sup>+</sup>      | 242.14339 | Atrazine- <sup>13</sup> C <sub>3</sub>                              |
| Propiconazole                   | Propico  | [C15H18Cl2N3O2] <sup>+</sup>  | 342.07706 | Propiconazole-d <sub>7</sub>                                        |
| Pyrimethanil                    | Pyri     | [C12H14N3] <sup>+</sup>       | 200.11822 | Pyrimethanil-d <sub>5</sub>                                         |
| Simazine                        | SMZ      | [C7H13ClN5] <sup>+</sup>      | 202.08540 | Atrazine- <sup>13</sup> C <sub>3</sub>                              |
| (S)-Metolachlor                 | Meto     | [C15H23ClNO2] <sup>+</sup>    | 284.14118 | Metolachlor-d <sub>6</sub>                                          |
| Tebuconazole                    | Tebu     | [C16H23ClN3O] <sup>+</sup>    | 308.15242 | Tebuconazole-d <sub>9</sub>                                         |
| Thiacloprid                     | Thiacl   | [C10H10ClN4S] <sup>+</sup>    | 253.03092 | Acetamiprid-d <sub>3</sub>                                          |
| Thiamethoxam                    | Thiam    | [C8H11ClN5O3S] <sup>+</sup>   | 292.02656 | Thiamethoxam-d <sub>3</sub>                                         |
| Topramezone                     | Topra    | [C16H18N3O5S] <sup>+</sup>    | 364.09617 | Thiamethoxam-d <sub>3</sub>                                         |
| Triclopyr                       | TA       | [C7H3Cl3NO3] <sup>-</sup>     | 253.91730 | 2,4-D- <sup>13</sup> C <sub>6</sub>                                 |
| Triclopyr 2-butoxyethylester    | TE       | [C13H17Cl3NO4] <sup>+</sup>   | 356.02177 | Propiconazole-d <sub>7</sub>                                        |

### Section S3 Study area and sampling coordinates

**Table S5** The surface area, cropland occupation, and crop proportion of each watershed in western Montérégie.

|                                                          | Châteauguay | Saint-Louis | Saint-Jacques | Tortue | Saint-Régis |
|----------------------------------------------------------|-------------|-------------|---------------|--------|-------------|
| Surface area (km <sup>2</sup> )                          | 1503        | 187         | 171           | 159    | 100         |
| Cropland occupation (%)                                  | 37          | >50*        | 43            | 0.4    | 59          |
| Crop proportion (%)                                      |             |             |               |        |             |
| - Corn                                                   | 40          | 47          | 45            | 7      | 29          |
| - Soybean                                                | 28          | 30          | 47            | 7      | 31          |
| - Multiple cropping                                      | 10          | 8           | 4             | 7      | 24          |
| - Hay                                                    | 9           | 5           | 0.3           | 4      | 7           |
| - Wheat                                                  | 3           | 3           | 3             | 16     | 2           |
| - Others (beans, cereals, vegetables, fruits, nuts etc.) | 9           | 7           | 0.8           | 60     | 8           |

\* The cropland occupancy of the Saint-Louis watershed was estimated using data from the Fiducie Agricole (Quebec) 2019 (1).

**Table S6** Sampling point coordinates and sampling dates.

| <b>River name</b> | <b>Date</b> |            | <b>Latitude</b> | <b>Longitude</b> | <b>Direction</b> | <b>Sample depth (m)</b> |
|-------------------|-------------|------------|-----------------|------------------|------------------|-------------------------|
| Saint-Pierre      | 2019-07-17  | 2021-07-13 | 45°20'42.3"     | 73°35'08.4"      | Downstream       | Subsurface between 1-2m |
| Châteauguay       | 2019-07-17  |            | 45°11'53.8"     | 73°51'48.6"      | Upstream         | Subsurface between 1-2m |
|                   | 2019-07-17  |            | 45°15'10.5"     | 73°47'59.0"      | Upstream         | Subsurface between 1-2m |
|                   | 2019-07-17  |            | 45°16'50.3"     | 73°48'06.9"      | Upstream         | Subsurface between 1-2m |
|                   | 2019-07-17  | 2021-07-13 | 45°22'52.5"     | 73°45'02.4"      | Downstream       | Subsurface between 1-2m |
| Saint Louis       | 2019-07-17  |            | 45°16'15.6"     | 73°53'44.3"      | Upstream         | Subsurface between 1-2m |
|                   | 2019-07-17  |            | 45°17'16.9"     | 73°53'14.5"      | Upstream         | Subsurface between 1-2m |
|                   | 2019-07-17  |            | 45°18'51.4"     | 73°52'47.2"      | Downstream       | Subsurface between 1-2m |
| Anglais           | 2019-07-17  |            | 45°10'59.2"     | 73°50'41.9"      | Upstream         | Subsurface between 1-2m |
|                   | 2019-07-17  | 2021-07-13 | 45°12'45.1"     | 73°49'39.8"      | Downstream       | Subsurface between 1-2m |
| Noire             | 2019-07-17  | 2021-07-13 | 45°05'10.9"     | 73°46'58.7"      | Downstream       | Subsurface between 1-2m |
| Norton            | 2019-07-17  | 2021-07-13 | 45°08'55.4"     | 73°47'13.0"      | Downstream       | Subsurface between 1-2m |
| Fèves             | 2019-07-17  | 2021-07-13 | 45°13'48.8"     | 73°48'47.5"      | Downstream       | Subsurface between 1-2m |
| Saint-Jaques      | 2019-07-17  | 2021-07-13 | 45°22'50.0"     | 73°28'44.5"      | Downstream       | Subsurface between 1-2m |
| Tortue            | 2019-07-17  |            | 45°19'40.0"     | 73°31'31.5"      | Upstream         | Subsurface between 1-2m |
|                   | 2019-07-17  | 2021-07-13 | 45°23'32.7"     | 73°32'16.7"      | Downstream       | Subsurface between 1-2m |
| Saint-Régis       | 2019-07-17  |            | 45°19'48.5"     | 73°39'55.7"      | Upstream         | Subsurface between 1-2m |
|                   | 2019-07-17  | 2021-07-13 | 45°23'57.5"     | 73°33'50.1"      | Downstream       | Subsurface between 1-2m |
| Esturgeon         | 2019-07-17  | 2021-07-13 | 45°15'37.2"     | 73°47'24.1"      | Downstream       | Subsurface between 1-2m |

## Section S4 Filter selection

**Table S7** The mean  $\pm$  SD filtration recovery (%) (n=3) of target pesticides during filtration of surface water (spiked at 500 ng L<sup>-1</sup>) onto glass fiber filter (GFF), nitrocellulose filter (NC), polyester filter (PETE), and regenerated cellulose filter (RC).

|                                            | GFF |       |    | NC  |       |    | PTFE |       |    | RC  |       |    |
|--------------------------------------------|-----|-------|----|-----|-------|----|------|-------|----|-----|-------|----|
| 2,4-D                                      | 96  | $\pm$ | 2  | 102 | $\pm$ | 4  | 101  | $\pm$ | 3  | 100 | $\pm$ | 5  |
| 3,5,6-Trichloro-2-pyridinol                | 93  | $\pm$ | 6  | 92  | $\pm$ | 3  | 99   | $\pm$ | 8  | 94  | $\pm$ | 6  |
| 4-chloro-2-methylphenoxyacetic acid (MCPA) | 101 | $\pm$ | 2  | 105 | $\pm$ | 7  | 104  | $\pm$ | 3  | 105 | $\pm$ | 5  |
| Acetamiprid                                | 95  | $\pm$ | 2  | 88  | $\pm$ | 8  | 100  | $\pm$ | 3  | 101 | $\pm$ | 5  |
| Alachlor                                   | 95  | $\pm$ | 6  | 76  | $\pm$ | 12 | 95   | $\pm$ | 2  | 100 | $\pm$ | 8  |
| Atrazine                                   | 97  | $\pm$ | 2  | 101 | $\pm$ | 6  | 100  | $\pm$ | 3  | 102 | $\pm$ | 5  |
| Atrazine-2-hydroxy                         | 96  | $\pm$ | 3  | 100 | $\pm$ | 5  | 99   | $\pm$ | 3  | 102 | $\pm$ | 6  |
| Azoxystrobin                               | 87  | $\pm$ | 4  | 3   | $\pm$ | 4  | 91   | $\pm$ | 3  | 92  | $\pm$ | 7  |
| Bentazon                                   | 82  | $\pm$ | 5  | 92  | $\pm$ | 6  | 97   | $\pm$ | 5  | 91  | $\pm$ | 6  |
| Bromoxynil                                 | 80  | $\pm$ | 5  | 88  | $\pm$ | 4  | 93   | $\pm$ | 8  | 85  | $\pm$ | 4  |
| Carbaryl                                   | 90  | $\pm$ | 4  | 92  | $\pm$ | 4  | 98   | $\pm$ | 5  | 99  | $\pm$ | 5  |
| Carbendazim                                | 96  | $\pm$ | 2  | 99  | $\pm$ | 12 | 99   | $\pm$ | 2  | 100 | $\pm$ | 3  |
| Chlorantraniliprole                        | 91  | $\pm$ | 6  | 92  | $\pm$ | 10 | 95   | $\pm$ | 5  | 100 | $\pm$ | 5  |
| Chlorothalonil                             | 123 | $\pm$ | 16 | 56  | $\pm$ | 13 | 102  | $\pm$ | 11 | 110 | $\pm$ | 6  |
| Chlorpyrifos                               | 82  | $\pm$ | 4  | ND  |       |    | 76   | $\pm$ | 5  | 76  | $\pm$ | 7  |
| Clothianidin                               | 97  | $\pm$ | 2  | 101 | $\pm$ | 4  | 103  | $\pm$ | 4  | 104 | $\pm$ | 5  |
| Cyanazine                                  | 79  | $\pm$ | 6  | 93  | $\pm$ | 9  | 97   | $\pm$ | 1  | 99  | $\pm$ | 9  |
| Deethylatrazine                            | 96  | $\pm$ | 5  | 100 | $\pm$ | 6  | 99   | $\pm$ | 3  | 100 | $\pm$ | 5  |
| Deisopropylatrazine                        | 100 | $\pm$ | 4  | 107 | $\pm$ | 6  | 104  | $\pm$ | 6  | 104 | $\pm$ | 8  |
| Dicamba                                    | 85  | $\pm$ | 12 | 92  | $\pm$ | 14 | 84   | $\pm$ | 1  | 87  | $\pm$ | 10 |
| Dimethenamid                               | 95  | $\pm$ | 6  | 89  | $\pm$ | 7  | 100  | $\pm$ | 3  | 100 | $\pm$ | 3  |
| Dinotefuran                                | 84  | $\pm$ | 7  | 89  | $\pm$ | 7  | 105  | $\pm$ | 12 | 93  | $\pm$ | 14 |
| Desnitro-imidacloprid                      | 60  | $\pm$ | 4  | 96  | $\pm$ | 13 | 114  | $\pm$ | 11 | 98  | $\pm$ | 19 |
| Fipronil                                   | 89  | $\pm$ | 1  | 69  | $\pm$ | 12 | 85   | $\pm$ | 5  | 93  | $\pm$ | 4  |
| Flonicamid                                 | 88  | $\pm$ | 6  | 98  | $\pm$ | 10 | 103  | $\pm$ | 14 | 100 | $\pm$ | 17 |
| Fluazinam                                  | 69  | $\pm$ | 8  | ND  |       |    | 12   | $\pm$ | 7  | 64  | $\pm$ | 6  |
| Flumetsulam                                | 93  | $\pm$ | 6  | 99  | $\pm$ | 3  | 100  | $\pm$ | 4  | 100 | $\pm$ | 8  |
| Fluxapyroxad                               | 98  | $\pm$ | 3  | 41  | $\pm$ | 15 | 94   | $\pm$ | 7  | 103 | $\pm$ | 11 |
| Fomesafen                                  | 100 | $\pm$ | 1  | 105 | $\pm$ | 9  | 106  | $\pm$ | 7  | 105 | $\pm$ | 1  |
| Hexazinone                                 | 94  | $\pm$ | 4  | 97  | $\pm$ | 8  | 100  | $\pm$ | 1  | 101 | $\pm$ | 6  |
| Imazethapyr                                | 93  | $\pm$ | 4  | 100 | $\pm$ | 9  | 95   | $\pm$ | 2  | 96  | $\pm$ | 3  |
| Imidacloprid                               | 96  | $\pm$ | 3  | 89  | $\pm$ | 8  | 99   | $\pm$ | 3  | 102 | $\pm$ | 4  |
| Linuron                                    | 93  | $\pm$ | 3  | 66  | $\pm$ | 10 | 100  | $\pm$ | 3  | 102 | $\pm$ | 4  |
| Mecoprop                                   | 102 | $\pm$ | 4  | 93  | $\pm$ | 1  | 99   | $\pm$ | 7  | 96  | $\pm$ | 9  |
| Mesotrione                                 | 94  | $\pm$ | 6  | 99  | $\pm$ | 8  | 100  | $\pm$ | 4  | 98  | $\pm$ | 7  |
| Metconazole                                | 88  | $\pm$ | 4  | 49  | $\pm$ | 14 | 91   | $\pm$ | 4  | 95  | $\pm$ | 6  |
| Metolachlor ESA                            | 101 | $\pm$ | 2  | 114 | $\pm$ | 10 | 104  | $\pm$ | 5  | 110 | $\pm$ | 6  |

|                                     |     |   |   |     |   |    |     |   |   |     |   |    |
|-------------------------------------|-----|---|---|-----|---|----|-----|---|---|-----|---|----|
| <b>Metolachlor OA</b>               | 115 | ± | 3 | 117 | ± | 7  | 100 | ± | 6 | 120 | ± | 8  |
| <b>Metribuzin</b>                   | 100 | ± | 1 | 102 | ± | 7  | 105 | ± | 6 | 103 | ± | 6  |
| <b>Nicosulfuron</b>                 | 95  | ± | 3 | 99  | ± | 6  | 99  | ± | 5 | 100 | ± | 6  |
| <b>Nitenpyram</b>                   | 93  | ± | 5 | 98  | ± | 8  | 100 | ± | 4 | 98  | ± | 8  |
| <b>Pendimethalin</b>                | 86  | ± | 7 | ND  |   |    | 71  | ± | 9 | 83  | ± | 9  |
| <b>Prometryn</b>                    | 96  | ± | 7 | 93  | ± | 8  | 99  | ± | 5 | 103 | ± | 10 |
| <b>Propiconazole</b>                | 92  | ± | 4 | 29  | ± | 16 | 95  | ± | 5 | 100 | ± | 7  |
| <b>Pyrimethanil</b>                 | 94  | ± | 3 | 76  | ± | 7  | 99  | ± | 4 | 101 | ± | 7  |
| <b>Simazine</b>                     | 94  | ± | 6 | 95  | ± | 6  | 98  | ± | 2 | 100 | ± | 6  |
| <b>(S)-Metolachlor</b>              | 99  | ± | 5 | 78  | ± | 11 | 98  | ± | 3 | 103 | ± | 7  |
| <b>Tebuconazole</b>                 | 89  | ± | 4 | 59  | ± | 11 | 95  | ± | 4 | 98  | ± | 9  |
| <b>Thiacloprid</b>                  | 95  | ± | 1 | 67  | ± | 15 | 100 | ± | 5 | 100 | ± | 3  |
| <b>Thiamethoxam</b>                 | 98  | ± | 5 | 97  | ± | 7  | 100 | ± | 4 | 103 | ± | 5  |
| <b>Topramezone</b>                  | 103 | ± | 6 | 113 | ± | 7  | 109 | ± | 8 | 115 | ± | 7  |
| <b>Triclopyr</b>                    | 106 | ± | 4 | 100 | ± | 3  | 101 | ± | 8 | 104 | ± | 1  |
| <b>Triclopyr 2-butoxyethylester</b> | 88  | ± | 6 | 1   | ± | 1  | 94  | ± | 9 | 95  | ± | 6  |

## Section S5 Instrument parameters

**Table S8** LC-HRMS method summary for the analysis of dicamba.

|                                             |                                                                                                                                                                                                |     |
|---------------------------------------------|------------------------------------------------------------------------------------------------------------------------------------------------------------------------------------------------|-----|
| <b>Instrument</b>                           | Thermo Q-Exactive Orbitrap mass spectrometer<br>Dionex Ultimate 3000 UHPLC chain                                                                                                               |     |
| <b>Ionization</b>                           | Heated electrospray ionization source, operated in negative ionization mode                                                                                                                    |     |
| <b>Acquisition mode</b>                     | Full Scan MS mode                                                                                                                                                                              |     |
| <b>Analytical column</b>                    | Thermo Hypersil Gold C18 column (100 × 2.1 mm; 1.9 μm)                                                                                                                                         |     |
| <b>Column Temperature</b>                   | 50°C                                                                                                                                                                                           |     |
| <b>Analytical Mobile Phases</b>             | A: 0.1 mM ammonium fluoride in HPLC-water<br>B: 0.1 mM ammonium fluoride in HPLC-methanol<br>Flow rate (mL/min) 0.45                                                                           |     |
| <b>Gradient Profile (analytical column)</b> | Time (min)                                                                                                                                                                                     | % B |
|                                             | 0.0                                                                                                                                                                                            | 40  |
|                                             | 3.5                                                                                                                                                                                            | 40  |
|                                             | 4.5                                                                                                                                                                                            | 55  |
|                                             | 5.5                                                                                                                                                                                            | 75  |
|                                             | 7.5                                                                                                                                                                                            | 100 |
|                                             | 8.8                                                                                                                                                                                            | 100 |
|                                             | 8.9                                                                                                                                                                                            | 40  |
|                                             | 9.0                                                                                                                                                                                            | 40  |
| <b>Injection Volume</b>                     | 5 mL (on-line SPE)                                                                                                                                                                             |     |
| <b>On-line SPE column</b>                   | Thermo Hypersil Gold aQ C18 column (20 mm × 2.1 mm, 12 μm)                                                                                                                                     |     |
| <b>On-line SPE Mobile Phases</b>            | A: 0.1% formic acid in HPLC-water<br>B: 0.1% formic acid in HPLC-methanol<br>Flow rate (mL/min) 2                                                                                              |     |
| <b>Gradient Profile (on-line SPE)</b>       | Time (min)                                                                                                                                                                                     | % B |
|                                             | 0.0                                                                                                                                                                                            | 0   |
|                                             | 3.5                                                                                                                                                                                            | 0   |
|                                             | 3.6                                                                                                                                                                                            | 100 |
|                                             | 6.6                                                                                                                                                                                            | 100 |
|                                             | 6.7                                                                                                                                                                                            | 0   |
|                                             | 9                                                                                                                                                                                              | 0   |
| <b>Source/gas</b>                           | Sheath gas flow rate 70<br>Aux gas flow rate 10<br>Sweep gas flow rate 0<br>Spray voltage ( V ) 3500<br>Capillary temperature (°C) 350<br>Vaporizer temperature (°C) 400<br>S-lens RF level 60 |     |
| <b>Orbitrap</b>                             | Resolution 70,000 at <i>m/z</i> 200                                                                                                                                                            |     |

|                   |                                                                                     |
|-------------------|-------------------------------------------------------------------------------------|
| <b>parameters</b> | AGC target 3e6<br>Maximum Inject Time (ms) 100<br>Scan range ( <i>m/z</i> ) 150-450 |
|-------------------|-------------------------------------------------------------------------------------|

**Table S9** LC-HRMS method summary for the analysis of glyphosate, glufosinate and AMPA (analyzed as the Fmoc-grafted compounds after derivation).

|                                             |                                                                                                                                                                                                |     |
|---------------------------------------------|------------------------------------------------------------------------------------------------------------------------------------------------------------------------------------------------|-----|
| <b>Instrument</b>                           | Thermo Q-Exactive Orbitrap mass spectrometer<br>Dionex Ultimate 3000 UHPLC chain                                                                                                               |     |
| <b>Ionization</b>                           | Heated electrospray ionization source, operated in positive ionization mode                                                                                                                    |     |
| <b>Acquisition mode</b>                     | Full Scan MS mode                                                                                                                                                                              |     |
| <b>Analytical column</b>                    | Thermo Hypersil Gold C18 column (50 × 2.1 mm; 1.9 μm)                                                                                                                                          |     |
| <b>Column Temperature</b>                   | 40°C                                                                                                                                                                                           |     |
| <b>Analytical Mobile Phases</b>             | A: 5 mM ammonium acetate in HPLC-water<br>B: HPLC-acetonitrile<br>Flow rate (mL/min) 0.45                                                                                                      |     |
| <b>Gradient Profile (analytical column)</b> | Time (min)                                                                                                                                                                                     | % B |
|                                             | 0.0                                                                                                                                                                                            | 25  |
|                                             | 2.0                                                                                                                                                                                            | 25  |
|                                             | 8.0                                                                                                                                                                                            | 95  |
|                                             | 9.4                                                                                                                                                                                            | 95  |
|                                             | 9.5                                                                                                                                                                                            | 25  |
|                                             | 10.0                                                                                                                                                                                           | 25  |
| <b>Injection Volume</b>                     | 1 mL (on-line SPE)                                                                                                                                                                             |     |
| <b>On-line SPE column</b>                   | Thermo Hypersep Retain PEP column (20 mm × 2.1 mm, 40–60 μm)                                                                                                                                   |     |
| <b>On-line SPE Mobile Phases</b>            | A: 0.1% formic acid in HPLC-water<br>B: 0.1% formic acid in HPLC-methanol<br>Flow rate (mL/min) 1.5                                                                                            |     |
| <b>Gradient Profile (on-line SPE)</b>       | Time (min)                                                                                                                                                                                     | % B |
|                                             | 0.0                                                                                                                                                                                            | 0   |
|                                             | 2.0                                                                                                                                                                                            | 0   |
|                                             | 2.1                                                                                                                                                                                            | 100 |
|                                             | 6.9                                                                                                                                                                                            | 100 |
|                                             | 7.0                                                                                                                                                                                            | 0   |
|                                             | 10.0                                                                                                                                                                                           | 0   |
| <b>Source/gas</b>                           | Sheath gas flow rate 50<br>Aux gas flow rate 10<br>Sweep gas flow rate 0<br>Spray voltage ( V ) 3500<br>Capillary temperature (°C) 320<br>Vaporizer temperature (°C) 350<br>S-lens RF level 60 |     |
| <b>Orbitrap parameters</b>                  | Resolution 70,000 at <i>m/z</i> 200<br>AGC target 3e6<br>Maximum Inject Time (ms) 100                                                                                                          |     |



---

|                                   |
|-----------------------------------|
| Scan range ( <i>m/z</i> ) 200-450 |
|-----------------------------------|

---

**Table S10** LC-HRMS method summary for the analysis of 52 target pesticides.

| <b>Instrument</b>          | Thermo Q-Exactive Orbitrap mass spectrometer<br>Dionex Ultimate 3000 UHPLC chain                                                                                                                                                                                              |            |     |     |    |     |     |     |     |     |    |      |    |
|----------------------------|-------------------------------------------------------------------------------------------------------------------------------------------------------------------------------------------------------------------------------------------------------------------------------|------------|-----|-----|----|-----|-----|-----|-----|-----|----|------|----|
| <b>Ionization</b>          | Heated electrospray ionization source, operated in fast polarity-switching mode                                                                                                                                                                                               |            |     |     |    |     |     |     |     |     |    |      |    |
| <b>Acquisition mode</b>    | Full Scan MS                                                                                                                                                                                                                                                                  |            |     |     |    |     |     |     |     |     |    |      |    |
| <b>Analytical column</b>   | Thermo Hypersil Gold C18 column (100 mm × 2.1 mm; 1.9 µm particle size)                                                                                                                                                                                                       |            |     |     |    |     |     |     |     |     |    |      |    |
| <b>Column Temperature</b>  | 50°C                                                                                                                                                                                                                                                                          |            |     |     |    |     |     |     |     |     |    |      |    |
| <b>Mobile Phases</b>       | A: 0.1 mM ammonium fluoride in HPLC-water<br>B: 0.1 mM ammonium fluoride in HPLC-methanol<br>Flow rate (mL/min) 0.45                                                                                                                                                          |            |     |     |    |     |     |     |     |     |    |      |    |
| <b>Gradient Profile</b>    | <table><thead><tr><th>Time (min)</th><th>% B</th></tr></thead><tbody><tr><td>0.0</td><td>10</td></tr><tr><td>7.0</td><td>100</td></tr><tr><td>9.0</td><td>100</td></tr><tr><td>9.1</td><td>10</td></tr><tr><td>11.0</td><td>10</td></tr></tbody></table>                      | Time (min) | % B | 0.0 | 10 | 7.0 | 100 | 9.0 | 100 | 9.1 | 10 | 11.0 | 10 |
| Time (min)                 | % B                                                                                                                                                                                                                                                                           |            |     |     |    |     |     |     |     |     |    |      |    |
| 0.0                        | 10                                                                                                                                                                                                                                                                            |            |     |     |    |     |     |     |     |     |    |      |    |
| 7.0                        | 100                                                                                                                                                                                                                                                                           |            |     |     |    |     |     |     |     |     |    |      |    |
| 9.0                        | 100                                                                                                                                                                                                                                                                           |            |     |     |    |     |     |     |     |     |    |      |    |
| 9.1                        | 10                                                                                                                                                                                                                                                                            |            |     |     |    |     |     |     |     |     |    |      |    |
| 11.0                       | 10                                                                                                                                                                                                                                                                            |            |     |     |    |     |     |     |     |     |    |      |    |
| <b>Injection Volume</b>    | 50 µL                                                                                                                                                                                                                                                                         |            |     |     |    |     |     |     |     |     |    |      |    |
| <b>Source/gas</b>          | Sheath gas flow rate 45 a.u. (arbitrary units)<br>Aux gas flow rate 15 a.u.<br>Sweep gas flow rate 0 a.u.<br>Positive spray voltage ( V ) 4500<br>Negative spray voltage ( V ) 3600<br>Capillary temperature (°C) 320<br>Vaporizer temperature (°C) 350<br>S-lens RF level 55 |            |     |     |    |     |     |     |     |     |    |      |    |
| <b>Orbitrap parameters</b> | Resolution 70,000 at <i>m/z</i> 200<br>AGC target 3e6<br>Maximum Inject Time (ms) 50<br>Scan range ( <i>m/z</i> ) 100-600                                                                                                                                                     |            |     |     |    |     |     |     |     |     |    |      |    |

## Section S6 Method validation

Matrix-matched calibration curves and quality control spikes were established by spiking a clean surface water matrix (with nondetectable levels of pesticides) according to a previous survey (2). Blank surface water was collected from the Saint-Maurice River at Grande Mère, a tract of the river located upstream from agricultural and urban areas.

For analytes that required pre-concentration by offline SPE, this blank surface water matrix was spiked with certified standards with 9 increasing levels from 0.01 to 100 ng L<sup>-1</sup>. Quality control samples were spiked at 75 ng L<sup>-1</sup>. Calibration curves of glyphosate, AMPA and glufosinate were set between 1 ng L<sup>-1</sup> and 1000 ng L<sup>-1</sup>, with quality controls spiked at 100 ng L<sup>-1</sup>. For dicamba, an 8-level calibration curve was established with concentrations between 0.5 and 1000 ng L<sup>-1</sup> and the quality control was set at 100 ng L<sup>-1</sup>. Calibration curves were generated using linear regressions (performance criterion on determination coefficients:  $R^2 > 0.9900$ ).

After the initial calibration had been run, continued calibration verification (CCV) standards were run during the LC-MS batch sequence to control accuracy performance (performance criterion: 70-130%). The matrix-matched quality control spikes were used to derive the method accuracy, intra-day precision, and inter-day precision. If analytes surpassed the upper calibration level in specific field samples, these were reanalyzed by applying a dilution factor to remain within the linear range.

**Table S11** Method validation in matrix-matched surface water, including the coefficient of determination ( $R^2$ ) of the calibration curve, whole-method accuracy (%) of matrix spikes, intra-day precision (%RSD), inter-day precision (%RSD), and the accuracy of continued calibration verification standards (%).

|                                            | Matrix-matched calibration | Matrix-spikes      |                                  |                                   |                                              |
|--------------------------------------------|----------------------------|--------------------|----------------------------------|-----------------------------------|----------------------------------------------|
|                                            | $R^2$                      | Accuracy (%) (n=5) | Intra-day precision (%RSD) (n=5) | Inter-day precision (%RSD) (n=15) | Continued calibration verification (%) (n=3) |
| 2,4-Dichlorophenoxyacetic acid             | 0.9979                     | 93                 | 10                               | 13                                | 74                                           |
| 3,5,6-Trichloro-2-pyridinol                | 0.9969                     | 98                 | 9                                | 12                                | 81                                           |
| 4-chloro-2-methylphenoxyacetic acid (MCPA) | 0.9988                     | 94                 | 7                                | 10                                | 84                                           |
| Acetamiprid                                | 0.9995                     | 106                | 2                                | 2                                 | 98                                           |
| Alachlor                                   | 0.9980                     | 103                | 4                                | 4                                 | 96                                           |
| Aminomethylphosphonic acid                 | 1.0000                     | 103                | 2                                | NA                                | 103                                          |
| Atrazine                                   | 0.9997                     | 105                | 2                                | 2                                 | 94                                           |
| Atrazine-2-hydroxy                         | 0.9997                     | 107                | 2                                | 2                                 | 100                                          |
| Azoxystrobin                               | 0.9997                     | 105                | 1                                | 3                                 | 99                                           |
| Bentazon                                   | 0.9997                     | 100                | 9                                | 12                                | 78                                           |
| Bromoxynil                                 | 0.9986                     | 94                 | 6                                | 11                                | 77                                           |
| Carbaryl                                   | 0.9999                     | 102                | 5                                | 6                                 | 95                                           |
| Carbendazim                                | 0.9996                     | 110                | 4                                | 4                                 | 100                                          |
| Chlorantraniliprole                        | 0.9994                     | 102                | 4                                | 7                                 | 95                                           |
| Chlorothalonil                             | 0.9956                     | 95                 | 9                                | 13                                | 77                                           |
| Chlorpyrifos                               | 0.9962                     | 108                | 8                                | 15                                | 92                                           |
| Clothianidin                               | 0.9995                     | 100                | 2                                | 5                                 | 96                                           |
| Cyanazine                                  | 0.9969                     | 107                | 3                                | 4                                 | 102                                          |
| Desethylatrazine                           | 0.9998                     | 98                 | 4                                | 5                                 | 86                                           |
| Desisopropylatrazine                       | 0.9995                     | 96                 | 5                                | 6                                 | 82                                           |
| Desnitro-imidacloprid                      | 0.9952                     | 97                 | 5                                | 6                                 | 105                                          |
| Dicamba                                    | 0.9980                     | 94                 | 2                                | NA                                | 94                                           |
| Dimethenamid                               | 0.9997                     | 104                | 3                                | 3                                 | 99                                           |
| Dinotefuran                                | 0.9989                     | 110                | 4                                | 5                                 | 105                                          |
| Fipronil                                   | 0.9991                     | 101                | 8                                | 11                                | 77                                           |
| Flonicamid                                 | 0.9971                     | 90                 | 8                                | 11                                | 82                                           |
| Fluazinam                                  | 0.9977                     | 105                | 12                               | 16                                | 92                                           |
| Flumetsulam                                | 0.9997                     | 111                | 4                                | 7                                 | 97                                           |
| Fluxapyroxad                               | 0.9998                     | 120                | 2                                | 5                                 | 116                                          |
| Fomesafen                                  | 0.9998                     | 100                | 9                                | 12                                | 83                                           |
| Glufosinate                                | 0.9999                     | 100                | 2                                | NA                                | 100                                          |

|                                        |        |     |    |    |     |
|----------------------------------------|--------|-----|----|----|-----|
| <b>Glyphosate</b>                      | 0.9974 | 103 | 6  | NA | 105 |
| <b>Hexazinone</b>                      | 0.9986 | 101 | 2  | 3  | 92  |
| <b>Imazethapyr</b>                     | 0.9998 | 116 | 4  | 4  | 103 |
| <b>Imidacloprid</b>                    | 0.9990 | 110 | 4  | 4  | 96  |
| <b>Linuron</b>                         | 0.9998 | 105 | 1  | 3  | 100 |
| <b>Mecoprop</b>                        | 0.9993 | 97  | 7  | 12 | 79  |
| <b>Mesotrione</b>                      | 1.0000 | 109 | 5  | 6  | 107 |
| <b>Metconazole</b>                     | 0.9992 | 101 | 2  | 3  | 95  |
| <b>Metolachlor ethanesulfonic acid</b> | 0.9974 | 99  | 4  | 6  | 91  |
| <b>Metolachlor oxanilic acid</b>       | 0.9959 | 99  | 4  | 6  | 91  |
| <b>Metribuzin</b>                      | 0.9986 | 105 | 2  | 3  | 93  |
| <b>Nicosulfuron</b>                    | 0.9997 | 101 | 8  | 9  | 99  |
| <b>Nitenpyram</b>                      | 0.9987 | 113 | 3  | 3  | 102 |
| <b>Pendimethalin</b>                   | 0.9955 | 113 | 7  | 18 | 90  |
| <b>Prometryn</b>                       | 0.9997 | 107 | 5  | 6  | 94  |
| <b>Propiconazole</b>                   | 0.9995 | 103 | 2  | 3  | 99  |
| <b>Pyrimethanil</b>                    | 0.9997 | 108 | 2  | 3  | 101 |
| <b>Simazine</b>                        | 0.9997 | 107 | 3  | 4  | 98  |
| <b>(S)-Metolachlor</b>                 | 0.9999 | 104 | 3  | 3  | 98  |
| <b>Tebuconazole</b>                    | 0.9965 | 115 | 3  | 4  | 111 |
| <b>Thiacloprid</b>                     | 0.9996 | 106 | 2  | 4  | 101 |
| <b>Thiamethoxam</b>                    | 0.9996 | 108 | 3  | 3  | 104 |
| <b>Topramezone</b>                     | 0.9995 | 108 | 3  | 4  | 103 |
| <b>Triclopyr</b>                       | 0.9973 | 90  | 10 | 13 | 80  |
| <b>Triclopyr 2-butoxyethylester</b>    | 0.9980 | 89  | 4  | 12 | 92  |

## Section S7 Absolute extraction efficiency evaluation

The preparation procedure involved a surface water matrix from the Saint-Maurice River spiked with certified standards prior to the extraction step (n=3) versus the same matrix spiked before the LC-MS analysis (3).

The absolute extraction efficiency was calculated as follows:

$$\text{Absolute extraction efficiency} = 100 * \frac{\text{Before} - \text{Blank}}{\text{After} - \text{Blank}}$$

Where **before** and **after** refer to the chromatogram responses of certified analyte spiked before and after sample extraction, respectively, and **blank** refers to the analyte response in non-spiked matrix sample.

**Table S12** Absolute extraction efficiencies (%) (mean  $\pm$  SD, n=3) of selected pesticides on Strata™-X Polymeric Reversed Phase SPE cartridge (X) versus Strata™ X-AW weak-anion exchange cartridge (X-AW).

|                                            | X            | X-AW         |
|--------------------------------------------|--------------|--------------|
| 2,4-Dichlorophenoxyacetic acid             | 82 $\pm$ 21  | 102 $\pm$ 16 |
| 3,5,6-Trichloro-2-pyridinol                | 107 $\pm$ 0  | 96 $\pm$ 19  |
| 4-chloro-2-methylphenoxyacetic acid (MCPA) | 82 $\pm$ 12  | 105 $\pm$ 12 |
| Acetamiprid                                | 102 $\pm$ 3  | 88 $\pm$ 1   |
| Alachlor                                   | 103 $\pm$ 8  | 94 $\pm$ 4   |
| Atrazine                                   | 94 $\pm$ 3   | 86 $\pm$ 8   |
| Atrazine-2-hydroxy                         | 100 $\pm$ 7  | 94 $\pm$ 7   |
| Azoxystrobin                               | 97 $\pm$ 5   | 92 $\pm$ 9   |
| Bentazon                                   | 81 $\pm$ 16  | 100 $\pm$ 11 |
| Bromoxynil                                 | 114 $\pm$ 4  | 94 $\pm$ 14  |
| Carbaryl                                   | 80 $\pm$ 15  | 81 $\pm$ 16  |
| Carbendazim                                | 97 $\pm$ 3   | 87 $\pm$ 5   |
| Chlorantraniliprole                        | 92 $\pm$ 13  | 79 $\pm$ 5   |
| Chlorothalonil                             | 97 $\pm$ 14  | 11 $\pm$ 19  |
| Chlorpyrifos                               | 131 $\pm$ 32 | 87 $\pm$ 2   |
| Clothianidin                               | 103 $\pm$ 7  | 109 $\pm$ 2  |
| Cyanazine                                  | 100 $\pm$ 19 | 97 $\pm$ 4   |
| Desethylatrazine                           | 103 $\pm$ 3  | 105 $\pm$ 5  |
| Desisopropylatrazine                       | 95 $\pm$ 15  | 82 $\pm$ 4   |
| Desnitro-imidacloprid                      | 95 $\pm$ 1   | -2 $\pm$ 2   |
| Dimethenamid                               | 99 $\pm$ 2   | 96 $\pm$ 1   |
| Dinotefuran                                | 51 $\pm$ 7   | 51 $\pm$ 8   |
| Fipronil                                   | 100 $\pm$ 9  | 93 $\pm$ 3   |
| Flonicamid                                 | 94 $\pm$ 6   | ND           |
| Fluazinam                                  | 111 $\pm$ 26 | 52 $\pm$ 15  |
| Flumetsulam                                | 104 $\pm$ 12 | 113 $\pm$ 6  |
| Fluxapyroxad                               | 83 $\pm$ 6   | 93 $\pm$ 10  |
| Fomesafen                                  | 111 $\pm$ 3  | 110 $\pm$ 12 |
| Hexazinone                                 | 100 $\pm$ 5  | 96 $\pm$ 5   |
| Imazethapyr                                | 98 $\pm$ 5   | 67 $\pm$ 8   |
| Imidacloprid                               | 92 $\pm$ 12  | 127 $\pm$ 14 |
| Linuron                                    | 100 $\pm$ 2  | 97 $\pm$ 8   |
| Mecoprop                                   | 97 $\pm$ 4   | 92 $\pm$ 16  |
| Mesotrione                                 | 61 $\pm$ 5   | 79 $\pm$ 5   |
| Metconazole                                | 102 $\pm$ 2  | 94 $\pm$ 2   |
| Metolachlor ethanesulfonic acid            | 88 $\pm$ 17  | 98 $\pm$ 13  |
| Metolachlor oxanilic acid                  | 103 $\pm$ 8  | 104 $\pm$ 13 |
| Metribuzin                                 | 103 $\pm$ 11 | 131 $\pm$ 15 |
| Nicosulfuron                               | 83 $\pm$ 4   | 99 $\pm$ 15  |
| Nitenpyram                                 | 112 $\pm$ 6  | 95 $\pm$ 7   |

|                                     |          |          |
|-------------------------------------|----------|----------|
| <b>Pendimethalin</b>                | 118 ± 13 | 94 ± 25  |
| <b>Prometryn</b>                    | 99 ± 2   | 88 ± 3   |
| <b>Propiconazole</b>                | 95 ± 5   | 99 ± 8   |
| <b>Pyrimethanil</b>                 | 96 ± 2   | 88 ± 5   |
| <b>Simazine</b>                     | 92 ± 9   | 103 ± 3  |
| <b>(S)-Metolachlor</b>              | 101 ± 4  | 93 ± 8   |
| <b>Tebuconazole</b>                 | 85 ± 10  | 70 ± 7   |
| <b>Thiacloprid</b>                  | 96 ± 5   | 95 ± 0   |
| <b>Thiamethoxam</b>                 | 106 ± 5  | 100 ± 7  |
| <b>Topramezone</b>                  | 90 ± 14  | 98 ± 11  |
| <b>Triclopyr</b>                    | 114 ± 19 | 108 ± 32 |
| <b>Triclopyr 2-butoxyethylester</b> | 115 ± 1  | 84 ± 2   |

---



## **Section S8 Determination of method limit of detection**

The limit of detection (LOD) for each analyte was evaluated using one of the following approaches. 1) When method blanks contain detectable analytes, the LOD was primarily derived from the standard deviation of the calculated concentrations of the blank samples ( $n$ ), multiplied by the t-distributions value with  $(n-1)$  degrees of freedom at a 99% percentile (4); 2) the LOD was determined based on the signal/noise height ratio of a lower calibration level (3); 3) For analytes not applicable to the above LOD determination methods, the calibration curve method was used, i.e., derived from the ratio of the standard error of y-intercept and the slope of the regression curve (5). A fourth approach consisted in assigning the LOD to the first acceptable concentration level of the calibration curve. The LODs for all the analytes are presented below in Table S13.

**Table S13** Limit of detection (LOD, ng L<sup>-1</sup>) for the targeted compounds in surface water and corresponding estimation methods.

|                                            | LOD<br>(ng L <sup>-1</sup> ) | Estimation methods                              |
|--------------------------------------------|------------------------------|-------------------------------------------------|
| 2,4-D                                      | 0.1                          | The first detectable level of calibration curve |
| 3,5,6-Trichloro-2-pyridinol                | 0.2                          | Standard error/slope ratio method               |
| 4-chloro-2-methylphenoxyacetic acid (MCPA) | 0.05                         | The first detectable level of calibration curve |
| Acetamiprid                                | 0.01                         | The first detectable level of calibration curve |
| Alachlor                                   | 0.249                        | Standard error/slope ratio method               |
| Aminomethylphosphonic acid                 | 2                            | The first detectable level of calibration curve |
| Atrazine                                   | 0.001                        | Signal/noise ratio method                       |
| Atrazine-2-hydroxy                         | 0.02                         | Blank variation method                          |
| Azoxystrobin                               | 0.02                         | Standard error/slope ratio method               |
| Bentazon                                   | 0.3                          | Signal/noise ratio method                       |
| Bromoxynil                                 | 0.026                        | Standard error/slope ratio method               |
| Carbaryl                                   | 0.025                        | Signal/noise ratio method                       |
| Carbendazim                                | 0.015                        | Signal/noise ratio method                       |
| Chlorantraniliprole                        | 0.1                          | The first detectable level of calibration curve |
| Chlorothalonil                             | 0.5                          | The first detectable level of calibration curve |
| Chlorpyrifos                               | 1.2                          | Standard error/slope ratio method               |
| Clothianidin                               | 0.1                          | The first detectable level of calibration curve |
| Cyanazine                                  | 4.5                          | Signal/noise ratio method                       |
| Desethylatrazine                           | 0.13                         | Blank variation method                          |
| Desisopropylatrazine                       | 0.058                        | Blank variation method                          |
| Desnitro-imidacloprid                      | 0.024                        | Standard error/slope ratio method               |
| Dicamba                                    | 5                            | The first detectable level of calibration curve |
| Dimethenamid                               | 0.034                        | Standard error/slope ratio method               |
| Dinotefuran                                | 0.018                        | Standard error/slope ratio method               |
| Fipronil                                   | 0.05                         | The first detectable level of calibration curve |

|                              |       |                                                 |
|------------------------------|-------|-------------------------------------------------|
| Flonicamid                   | 0.31  | Standard error/slope ratio method               |
| Fluazinam                    | 0.1   | The first detectable level of calibration curve |
| Flumetsulam                  | 0.032 | Standard error/slope ratio method               |
| Fluxapyroxad                 | 0.01  | The first detectable level of calibration curve |
| Fomesafen                    | 0.05  | The first detectable level of calibration curve |
| Glufosinate                  | 0.6   | Blank variation method                          |
| Glyphosate                   | 2     | Blank variation method                          |
| Hexazinone                   | 0.07  | Standard error/slope ratio method               |
| Imazethapyr                  | 0.01  | The first detectable level of calibration curve |
| Imidacloprid                 | 0.015 | Signal/noise ratio method                       |
| Linuron                      | 0.01  | The first detectable level of calibration curve |
| Mecoprop                     | 0.05  | The first detectable level of calibration curve |
| Mesotrione                   | 0.328 | Standard error/slope ratio method               |
| Metconazole                  | 0.05  | The first detectable level of calibration curve |
| Metolachlor ESA              | 0.007 | Signal/noise ratio method                       |
| Metolachlor OA               | 0.008 | Signal/noise ratio method                       |
| Metribuzin                   | 0.37  | Standard error/slope ratio method               |
| Nicosulfuron                 | 0.05  | The first detectable level of calibration curve |
| Nitenpyram                   | 0.046 | Signal/noise ratio method                       |
| Pendimethalin                | 0.5   | The first detectable level of calibration curve |
| Prometryn                    | 0.05  | The first detectable level of calibration curve |
| Propiconazole                | 0.19  | Blank variation method                          |
| Pyrimethanil                 | 0.01  | The first detectable level of calibration curve |
| Simazine                     | 0.02  | Blank variation method                          |
| (S)-Metolachlor              | 0.08  | Blank variation method                          |
| Tebuconazole                 | 0.018 | Blank variation method                          |
| Thiacloprid                  | 0.05  | The first detectable level of calibration curve |
| Thiamethoxam                 | 0.01  | The first detectable level of calibration curve |
| Topramezone                  | 0.5   | The first detectable level of calibration curve |
| Triclopyr                    | 2.15  | Standard error/slope ratio method               |
| Triclopyr 2-butoxyethylester | 0.1   | The first detectable level of calibration curve |

## Section S9 Quebec's water quality criteria for the protection of aquatic life

**Table S14** Quebec's water quality criteria<sup>1</sup> for the protection of aquatic life (ng L<sup>-1</sup>).

|                                            | CALC                | AALC                  |                              | CALC               | AALC                  |
|--------------------------------------------|---------------------|-----------------------|------------------------------|--------------------|-----------------------|
| 2,4-Dichlorophenoxyacetic acid             | 220000              | 1400000               | Fomesafen                    |                    |                       |
| 3,5,6-Trichloro-2-pyridinol                |                     |                       | Glufosinate                  |                    |                       |
| 4-chloro-2-methylphenoxyacetic acid (MCPA) | 2600 <sup>2</sup>   |                       |                              |                    |                       |
| Acetamiprid                                | 8.3 <sup>3</sup>    | 200 <sup>3</sup>      | Glyphosate                   | 800000             |                       |
| Alachlor                                   | 11000               | 150000                | Hexazinone                   | 330 <sup>2</sup>   | 1000000 <sup>2</sup>  |
| Aminomethylphosphonic acid (AMPA)          |                     |                       | Imazethapyr                  | 8100 <sup>2</sup>  | 34000000 <sup>2</sup> |
| Atrazine                                   | 1800 <sup>4</sup>   | 50000                 | Imidacloprid                 | 8.3 <sup>3</sup>   | 200 <sup>3</sup>      |
| Atrazine-2-hydroxy                         | 1800 <sup>4</sup>   |                       | Linuron                      | 7000 <sup>2</sup>  |                       |
| Azoxystrobin                               | 1240 <sup>5</sup>   |                       | Mecoprop                     | 13000 <sup>2</sup> | 10000000 <sup>2</sup> |
| Bentazon                                   | 510000 <sup>2</sup> | 11000000 <sup>2</sup> | Mesotrione                   |                    |                       |
| Bromoxynil                                 | 5000                |                       | Metconazole                  |                    |                       |
| Carbaryl                                   | 200                 |                       | Metolachlor ESA              |                    |                       |
| Carbendazim                                |                     |                       | Metolachlor OA               |                    |                       |
| Chlorantraniliprole                        | 100 <sup>2</sup>    | 560 <sup>2</sup>      | Metribuzin                   | 1000 <sup>2</sup>  |                       |
| Chlorothalonil                             | 180 <sup>2</sup>    |                       | Nicosulfuron                 |                    |                       |
| Chlorpyrifos                               | 2                   | 20                    | Nitenpyram                   | 8.3 <sup>3</sup>   | 200 <sup>3</sup>      |
| Clothianidin                               | 8.3 <sup>3</sup>    | 200 <sup>3</sup>      | Pendimethalin                |                    |                       |
| Cyanazine                                  | 2000 <sup>2</sup>   | 1000000               | Prometryn                    |                    |                       |
| Deethylatrazine                            | 1800 <sup>4</sup>   |                       | Propiconazole                | 3700               |                       |
| Deisopropylatrazine                        | 1800 <sup>4</sup>   |                       | Pyrimethanyl                 |                    |                       |
| Desnitro-imidacloprid                      |                     |                       | Simazine                     | 10000              | 160000                |
| Dicamba                                    | 10000 <sup>2</sup>  |                       | (S)-metolachlor              | 7800 <sup>2</sup>  | 110000                |
| Dimethenamide                              | 5600 <sup>2</sup>   | 260000 <sup>2</sup>   | Tebuconazole                 |                    |                       |
| Dinotefuran                                | 8.3 <sup>3</sup>    | 200 <sup>3</sup>      | Thiacloprid                  | 8.3 <sup>3</sup>   | 200 <sup>3</sup>      |
| Fipronil                                   |                     |                       | Thiamethoxam                 | 8.3 <sup>3</sup>   | 200 <sup>3</sup>      |
| Flonicamid                                 |                     |                       | Topramezone                  |                    |                       |
| Fluazinam                                  |                     |                       | Triclopyr                    |                    |                       |
| Flumetsulame                               | 3100 <sup>2</sup>   | 25000000 <sup>2</sup> | Triclopyr 2-butoxyethylester |                    |                       |
| Fluxapyroxad                               |                     |                       |                              |                    |                       |

<sup>1</sup> MELCC (2023) [https://www.environnement.gouv.qc.ca/eau/criteres\\_eau/index.asp](https://www.environnement.gouv.qc.ca/eau/criteres_eau/index.asp)

<sup>2</sup> Provisional criterion

<sup>3</sup> CALC and AALC were developed for one or the sum of neonicotinoids

<sup>4</sup> CALC of 1800 ng/L for the sum of atrazine and its transformation products

<sup>5</sup> Giroux I. Présence de pesticides dans l'eau au Québec : Portrait et tendances dans les zones de maïs et de soya – 2018 à 2020, Québec. Ministère de l'Environnement et de la Lutte contre les changements climatiques, Direction de la qualité des milieux aquatiques; 2022

## Section S10 Occurrence of pesticides in the surface water of western Montérégie

**Table S15** Detection frequencies (DF), concentrations (min, max, median, mean), and method detection limits (MDL) for the detected pesticides and transformation products in the surface waters (n=8 for upstream and n=11 for downstream) of western Montérégie in the summer of 2019.

|                                | MDL<br>(ng L <sup>-1</sup> ) | Summer 2019 upstream |                       |      |        |      | Summer 2019 downstream |      |                       |        |      |  |  |
|--------------------------------|------------------------------|----------------------|-----------------------|------|--------|------|------------------------|------|-----------------------|--------|------|--|--|
|                                |                              | DF<br>(%)            | Min                   | Max  | Median | Mean | DF<br>(%)              | Min  | Max                   | Median | Mean |  |  |
|                                |                              |                      | (ng L <sup>-1</sup> ) |      |        |      |                        |      | (ng L <sup>-1</sup> ) |        |      |  |  |
| <b>Herbicides</b>              |                              |                      |                       |      |        |      |                        |      |                       |        |      |  |  |
| Glyphosate                     | 2                            | 100                  | 30                    | 915  | 127    | 259  | 100                    | 87   | 4095                  | 681    | 1137 |  |  |
| (S)-Metolachlor                | 0.08                         | 100                  | 158                   | 2788 | 345    | 761  | 100                    | 36   | 2519                  | 858    | 906  |  |  |
| 2,4-D                          | 0.1                          | 100                  | 6                     | 229  | 74     | 86   | 100                    | 6    | 189                   | 53     | 69   |  |  |
| Metribuzin                     | 0.37                         | 100                  | 12                    | 123  | 40     | 52   | 100                    | 28   | 203                   | 92     | 96   |  |  |
| Atrazine                       | 0.001                        | 100                  | 40                    | 158  | 54     | 73   | 100                    | 12   | 426                   | 74     | 132  |  |  |
| Bentazon                       | 0.3                          | 100                  | 11                    | 45   | 22     | 23   | 100                    | 3    | 574                   | 46     | 139  |  |  |
| MCPA                           | 0.05                         | 100                  | 5                     | 172  | 25     | 63   | 100                    | 3    | 530                   | 24     | 85   |  |  |
| Dimethenamid                   | 0.034                        | 100                  | 1                     | 44   | 8      | 13   | 100                    | 3    | 174                   | 15     | 40   |  |  |
| Simazine                       | 0.02                         | 100                  | 0.5                   | 50   | 2      | 10   | 100                    | 0.4  | 19                    | 2      | 4    |  |  |
| Flumetsulam                    | 0.032                        | 100                  | 0.1                   | 17   | 2      | 4    | 100                    | 0.2  | 21                    | 3      | 5    |  |  |
| Mesotrione                     | 0.328                        | 88                   | 6                     | 366  | 21     | 81   | 100                    | 6    | 256                   | 23     | 63   |  |  |
| Cyanazine                      | 4.5                          | 100                  | 12                    | 20   | 17     | 16   | 91                     | 9    | 44                    | 17     | 21   |  |  |
| Fomesafen                      | 0.05                         | 100                  | 0.3                   | 25   | 6      | 7    | 91                     | 2.6  | 45                    | 7      | 12   |  |  |
| Prometryn                      | 0.05                         | 75                   | 0.1                   | 22   | 6      | 8    | 100                    | 0.1  | 178                   | 26     | 47   |  |  |
| Pendimethalin                  | 0.5                          | 100                  | 1                     | 6    | 3      | 4    | 73                     | 4    | 18                    | 7      | 9    |  |  |
| Linuron                        | 0.01                         | 75                   | 0.04                  | 5    | 2      | 2    | 91                     | 0.02 | 553                   | 4      | 71   |  |  |
| Mecoprop                       | 0.05                         | 63                   | 0.3                   | 5    | 1      | 2    | 91                     | 0.1  | 7                     | 1      | 2    |  |  |
| Topramezone                    | 0.5                          | 63                   | 2                     | 4    | 3      | 3    | 91                     | 2    | 4                     | 2      | 3    |  |  |
| Bromoxynil                     | 0.026                        | 50                   | 0.08                  | 0.2  | 0.1    | 0.1  | 73                     | 0.1  | 3                     | 0.3    | 1    |  |  |
| Imazethapyr                    | 0.01                         | 38                   | 43                    | 43   | 43     | 43   | 64                     | 43   | 43                    | 43     | 43   |  |  |
| Dicamba                        | 5                            | 38                   | 31                    | 234  | 33     | 99   | 45                     | 7    | 67                    | 27     | 33   |  |  |
| Hexazinone                     | 0.07                         | 13                   | 0.1                   | 0.1  | 0.1    | 0.1  | 18                     | 0.2  | 3                     | 2      | 2    |  |  |
| Nicosulfuron                   | 0.05                         | -                    | -                     | -    | -      | -    | 9                      | 21   | 21                    | 21     | 21   |  |  |
| <b>Insecticides</b>            |                              |                      |                       |      |        |      |                        |      |                       |        |      |  |  |
| Chlorantraniliprole            | 0.1                          | 100                  | 1                     | 10   | 4      | 5    | 100                    | 2    | 45                    | 6      | 10   |  |  |
| Clothianidin                   | 0.1                          | 88                   | 7                     | 73   | 17     | 27   | 100                    | 11   | 265                   | 32     | 65   |  |  |
| Thiamethoxam                   | 0.01                         | 88                   | 1                     | 34   | 10     | 12   | 91                     | 2    | 514                   | 22     | 123  |  |  |
| Imidacloprid                   | 0.015                        | 63                   | 3                     | 28   | 8      | 10   | 100                    | 1    | 161                   | 23     | 57   |  |  |
| Acetamiprid                    | 0.01                         | 38                   | 0.02                  | 0.03 | 0.02   | 0.02 | 64                     | 0.07 | 5                     | 0.1    | 1    |  |  |
| Chlorpyrifos                   | 1.2                          | 25                   | 3                     | 20   | 11     | 11   | 64                     | 3    | 6                     | 3      | 4    |  |  |
| Flonicamid                     | 0.31                         | 38                   | 1                     | 1    | 1      | 1    | 27                     | 1    | 19                    | 5      | 8    |  |  |
| Nitenpyram                     | 0.046                        | 25                   | 0.1                   | 0.2  | 0.1    | 0.1  | 27                     | 0.1  | 0.2                   | 0.1    | 0.1  |  |  |
| Thiacloprid                    | 0.05                         | -                    | -                     | -    | -      | -    | 27                     | 0.1  | 1                     | 0.2    | 0.4  |  |  |
| Carbaryl                       | 0.025                        | 13                   | 1                     | 1    | 1      | 1    | -                      | -    | -                     | -      | -    |  |  |
| <b>Fungicides</b>              |                              |                      |                       |      |        |      |                        |      |                       |        |      |  |  |
| Propiconazole                  | 0.19                         | 100                  | 1                     | 5    | 1      | 2    | 100                    | 1    | 11                    | 2      | 3    |  |  |
| Azoxystrobin                   | 0.02                         | 100                  | 0.1                   | 6    | 1      | 1    | 100                    | 0.1  | 25                    | 5      | 7    |  |  |
| Fluxapyroxad                   | 0.01                         | 100                  | 1                     | 2    | 1      | 1    | 100                    | 1    | 4                     | 1      | 2    |  |  |
| Tebuconazole                   | 0.018                        | 100                  | 0.6                   | 16   | 1      | 3    | 100                    | 0.5  | 7                     | 1      | 2    |  |  |
| Carbendazim                    | 0.015                        | 100                  | 0.1                   | 4    | 0.1    | 1    | 100                    | 0.1  | 8                     | 0.7    | 2    |  |  |
| Metconazole                    | 0.05                         | 38                   | 0.05                  | 0.2  | 0.1    | 0.1  | 73                     | 0.1  | 1                     | 0.2    | 0.3  |  |  |
| Pyrimethanil                   | 0.01                         | 25                   | 0.01                  | 0.01 | 0.01   | 0.01 | 82                     | 0.01 | 1                     | 0.03   | 0.2  |  |  |
| Fluazinam                      | 0.1                          | 13                   | 0.1                   | 0.1  | 0.1    | 0.1  | 9                      | 0.2  | 0.2                   | 0.2    | 0.2  |  |  |
| Chlorothalonil                 | 0.5                          | -                    | -                     | -    | -      | -    | 9                      | 1    | 1                     | 1      | 1    |  |  |
| <b>Transformation Products</b> |                              |                      |                       |      |        |      |                        |      |                       |        |      |  |  |
| Metolachlor                    | 0.007                        | 100                  | 321                   | 1405 | 681    | 745  | 100                    | 447  | 2489                  | 1248   | 1287 |  |  |

|                             |       |     |     |     |     |     |     |     |      |     |      |  |
|-----------------------------|-------|-----|-----|-----|-----|-----|-----|-----|------|-----|------|--|
| ethanesulfonic acid         |       |     |     |     |     |     |     |     |      |     |      |  |
| AMPA                        | 2     | 100 | 57  | 781 | 196 | 303 | 100 | 153 | 5836 | 934 | 1564 |  |
| Metolachlor oxanilic acid   | 0.008 | 100 | 138 | 910 | 246 | 363 | 100 | 143 | 944  | 447 | 500  |  |
| Desethylatrazine            | 0.13  | 100 | 16  | 63  | 39  | 40  | 100 | 16  | 60   | 35  | 35   |  |
| Atrazine-2-hydroxy          | 0.02  | 100 | 8   | 32  | 19  | 19  | 100 | 9   | 52   | 28  | 31   |  |
| Desisopropylatrazine        | 0.058 | 100 | 7   | 35  | 17  | 19  | 100 | 5   | 23   | 12  | 13   |  |
| Desnitro-imidacloprid       | 0.024 | 13  | 0.8 | 0.8 | 0.8 | 0.8 | -   | -   | -    | -   | -    |  |
| 3,5,6-Trichloro-2-pyridinol | 0.2   | 13  | 0.9 | 0.9 | 0.9 | 0.9 | -   | -   | -    | -   | -    |  |

## Section S11 Pesticide sales in Quebec

**Table S16** The sales of pesticide in Quebec for 2018 (6), 2019 (7), and 2020 (8)

| Active ingredient (a.i.) | Type             | Sales volume (kg a.i.) * |          |          |
|--------------------------|------------------|--------------------------|----------|----------|
|                          |                  | 2018                     | 2019     | 2020     |
| 2,4-D                    | Herbicide        | C                        | C        | C        |
| Acetamiprid              | Insecticide      | B                        | B        | B        |
| Alachlor                 | Herbicide        | A                        | A        | A        |
| Atrazine                 | Herbicide        | D                        | D        | C        |
| Azoxystrobin             | Fungicide        | C                        | C        | C        |
| Bentazon                 | Herbicide        | D                        | D        | D        |
| Bromoxynil               | Herbicide        | C                        | C        | C        |
| Carbaryl                 | Insecticide      | C                        | C        | C        |
| Carbendazim              | Fungicide        | A                        | A        | A        |
| Chlorantraniliprole      | Insecticide      | C                        | C        | C        |
| Chlorothalonil           | Fungicide        | D                        | D        | D        |
| Chlorpyrifos             | Insecticide      | D                        | D        | C        |
| Clothianidin             | Insecticide      | C                        | B        | C        |
| Cyanazine                | Herbicide        | A                        | A        | A        |
| Dicamba                  | Herbicide        | D                        | D        | D        |
| Dimethenamid             | Herbicide        | C                        | C        | C        |
| Dinotefuran              | Insecticide      | A                        | A        | B        |
| Fipronil                 | Insecticide      | A                        | A        | A        |
| Flonicamid               | Insecticide      | B                        | B        | B        |
| Fluazinam                | Fungicide        | C                        | C        | C        |
| Flumetsulam              | Herbicide        | B                        | C        | B        |
| Fluxapyroxad             | Fungicide        | C                        | C        | C        |
| Fomesafen                | Herbicide        | C                        | D        | C        |
| Glufosinate              | Herbicide        | C                        | C        | D        |
| <b>Glyphosate</b>        | <b>Herbicide</b> | <b>E</b>                 | <b>E</b> | <b>E</b> |
| Hexazinone               | Herbicide        | D                        | D        | D        |
| Imazethapyr              | Herbicide        | C                        | C        | C        |
| Imidacloprid             | Insecticide      | C                        | B        | D        |
| Linuron                  | Herbicide        | D                        | D        | D        |
| MCPA                     | Herbicide        | D                        | D        | D        |
| Mecoprop                 | Herbicide        | C                        | C        | C        |
| Mesotrione               | Herbicide        | D                        | D        | D        |
| Metconazole              | Fungicide        | C                        | C        | C        |
| Metribuzin               | Herbicide        | D                        | D        | D        |
| Nicosulfuron             | Herbicide        | A                        | B        | B        |
| Nitenpyram               | Insecticide      | A                        | A        | A        |
| Pendimethalin            | Herbicide        | D                        | D        | D        |
| Prometryn                | Herbicide        | C                        | C        | C        |
| Propiconazole            | Fungicide        | C                        | C        | C        |
| Pyrimethanil             | Fungicide        | C                        | C        | C        |

|                              |                  |          |          |          |
|------------------------------|------------------|----------|----------|----------|
| Simazine                     | Herbicide        | C        | C        | C        |
| <b>(S)-Metolachlor</b>       | <b>Herbicide</b> | <b>E</b> | <b>E</b> | <b>E</b> |
| Tebuconazole                 | Fungicide        | C        | C        | C        |
| Thiacloprid                  | Insecticide      | B        | B        | C        |
| Thiamethoxam                 | Insecticide      | C        | C        | C        |
| Topramezone                  | Herbicide        | B        | A        | A        |
| Triclopyr                    | Herbicide        | A        | A        | A        |
| Triclopyr 2-butoxyethylester | Herbicide        | C        | C        | D        |

\*Sales scale (kg a.i.)

A: Not sold

B: 0-1000

C: 1000-10,000

D: 10,000-100,000.

E: 100,000-1,000,000



## **Section S12 Flowrate estimation for the watersheds in western Montérégie**

For the Châteauguay River, we adopted the daily flowrate ( $\text{m}^3 \text{s}^{-1}$ ) of July 2019 and July 2021 monitored by a hydrometric station (9) to calculate the monthly range of pesticide loads transported into the St. Lawrence River. However, for the Saint-Régis River, Tortue River, and Saint-Jacques River, no hydrometric stations were available, so we used simulated daily flowrate ( $\text{m}^3 \text{s}^{-1}$ ) at 50<sup>th</sup> percentile (10). Finally, for the Saint-Louis River, we used the historical daily flowrate ( $\text{m}^3 \text{s}^{-1}$ ) from July 1987, 1988, and 1989 to estimate the mass loads of pesticides (11).

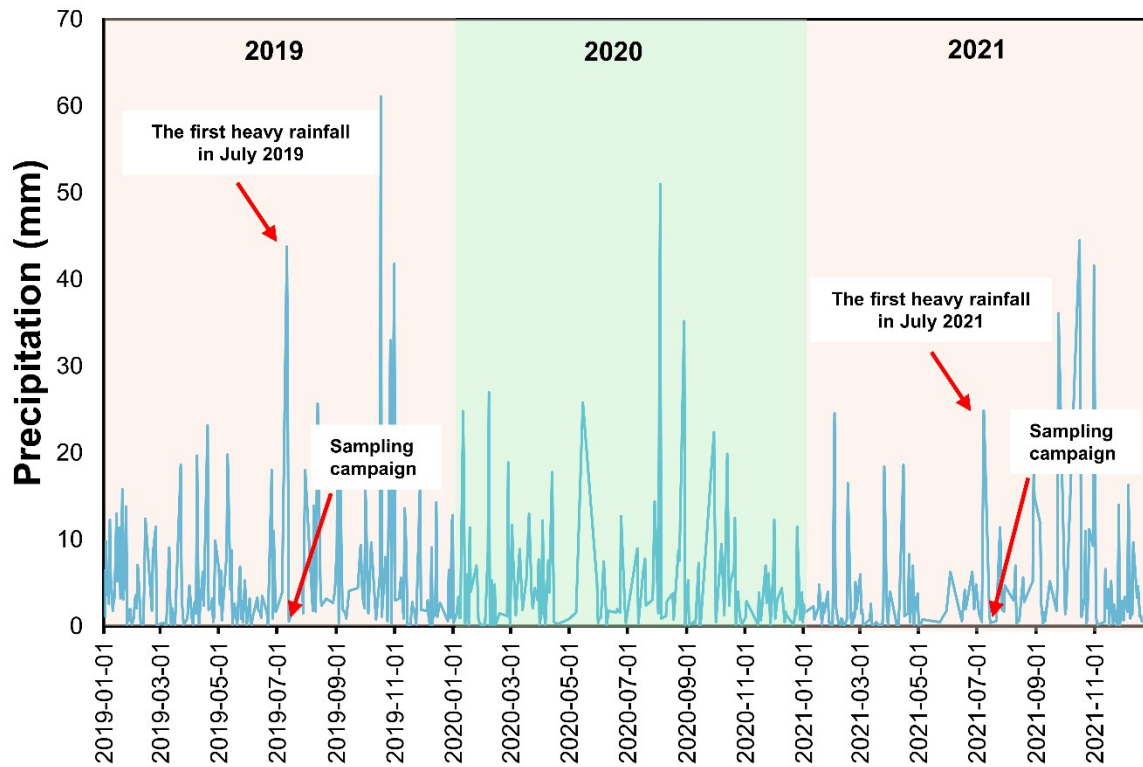

**Figure S1** Precipitation in western Montérégie from 2019 to 2021. Precipitation data were taken from Saint-Rémi, a city in western Montérégie (12).

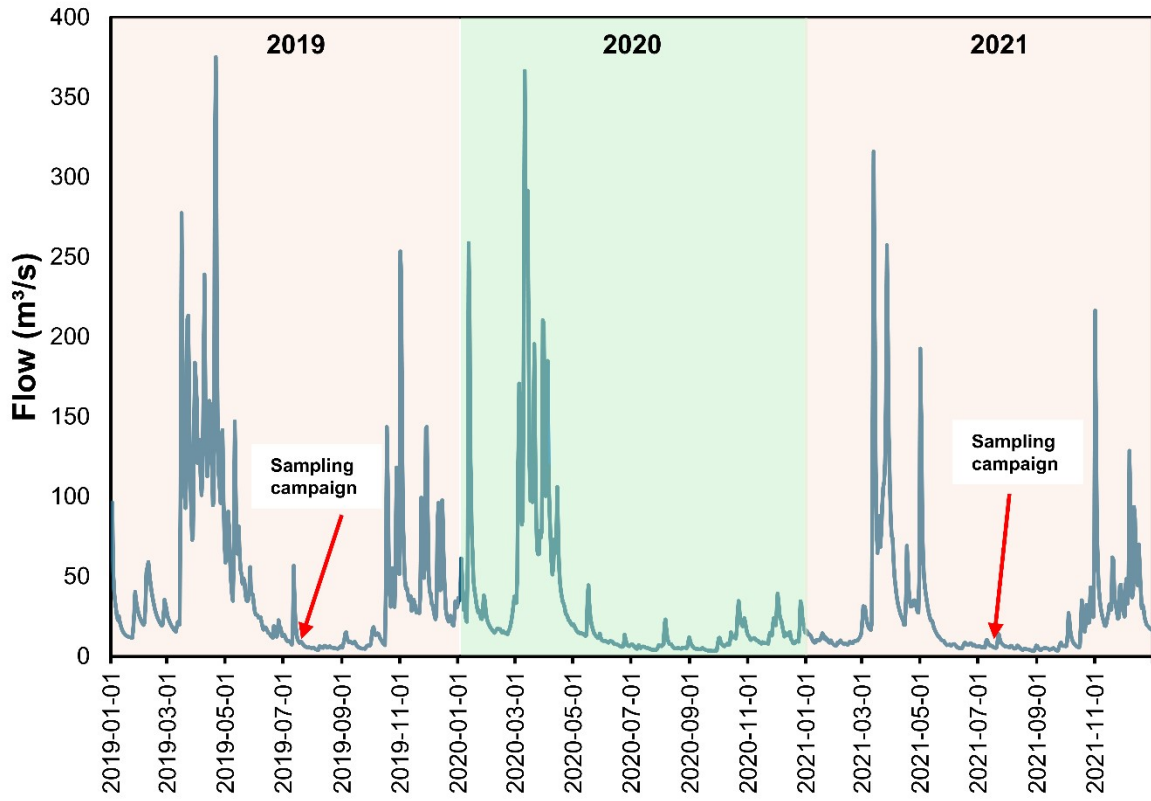

**Figure S2** Flowrates for the River Châteauguay from 2019 to 2021 (9).

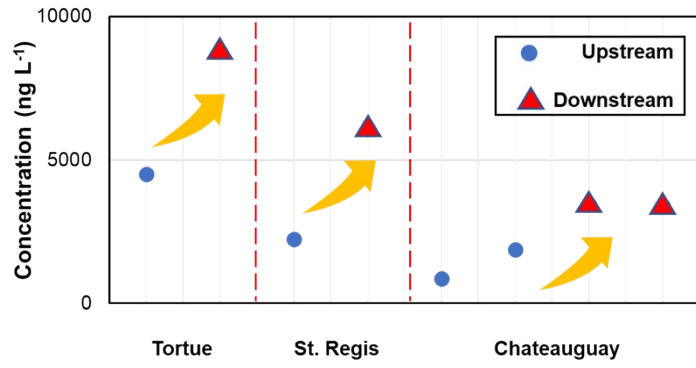

**Figure S3** Total pesticide concentrations in upstream and downstream sampling points of the Tortue River, St. Régis River, and the Châteauguay River in the summer of 2019.

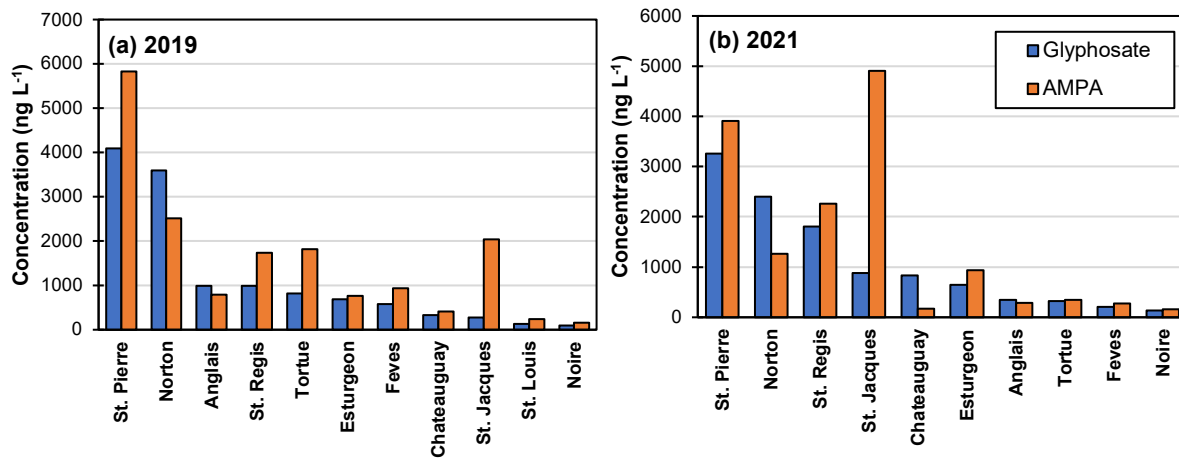

**Figure S4** Concentration of glyphosate and AMPA for all the investigated rivers in western Montérégie for 2019 (a) and 2021 (b). Only downstream data were used for analysis.

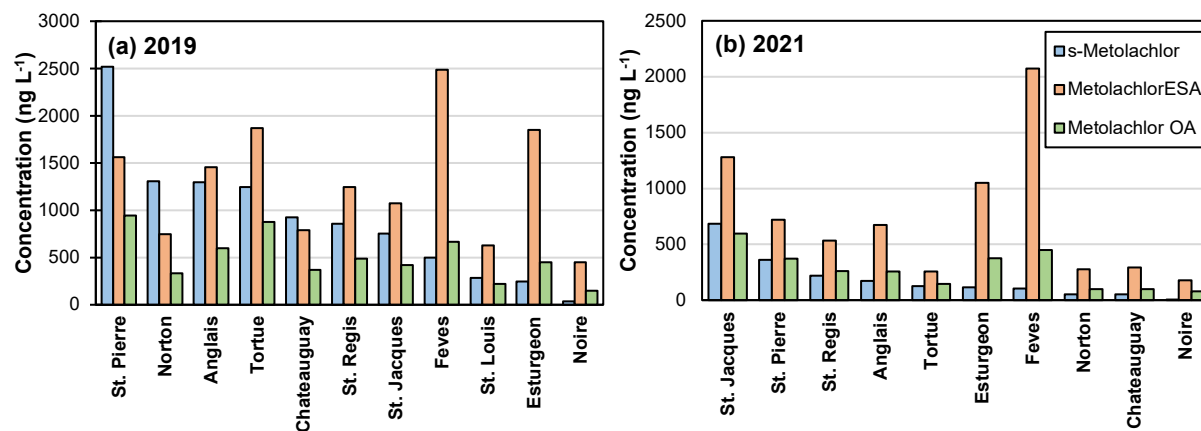

**Figure S5** Concentration of S-metolachlor, metolachlor ESA and metolachlor OA for all the investigated rivers in western Montérégie for 2019 (a) and 2021 (b). Only downstream data were used for analysis.

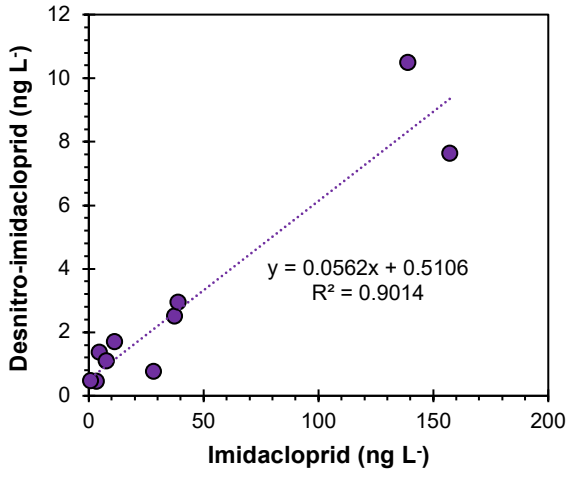

**Figure S6** The concentration of desnitro-imidacloprid versus the concentration of imidacloprid at all sampling points. Only the data that are higher than the limit of detection are presented.

## References

1. Fiducie Agricole. [Available from: <https://www.fiducieagricole.com/>]
2. Montiel-León JM, Munoz G, Duy SV, Do DT, Vaudreuil M-A, Goeury K, et al. Widespread occurrence and spatial distribution of glyphosate, atrazine, and neonicotinoids pesticides in the St. Lawrence and tributary rivers. *Environmental pollution*. 2019;250:29-39.
3. Picard J-C, Munoz G, Duy SV, Sauvé S. Longitudinal and vertical variations of waterborne emerging contaminants in the St. Lawrence Estuary and Gulf during winter conditions. *Science of the Total Environment*. 2021;777:146073.
4. Muir D, Sverko E. Analytical methods for PCBs and organochlorine pesticides in environmental monitoring and surveillance: a critical appraisal. *Analytical and bioanalytical chemistry*. 2006;386:769-789.
5. Araujo P. Key aspects of analytical method validation and linearity evaluation. *Journal of chromatography B*. 2009;877(23):2224-2234.
6. MELCC. Bilan des ventes de pesticides au Québec pour l'année 2018 (Québec). Ministère de l'Environnement et de la Lutte contre les changements climatiques; 2020.
7. MELCC. Bilan des ventes de pesticides au Québec pour l'année 2019 (Québec). Ministère de l'Environnement et de la Lutte contre les changements climatiques; 2021.
8. MELCC. Bilan des ventes de pesticides au Québec pour l'année 2020 (Québec). Ministère de l'Environnement et de la Lutte contre les changements climatiques; 2022.
9. CEHQ. [Available from: [https://www.cehq.gouv.qc.ca/hydrometrie/historique\\_donnees/fiche\\_station.asp?NoStation=030905](https://www.cehq.gouv.qc.ca/hydrometrie/historique_donnees/fiche_station.asp?NoStation=030905)]
10. CEHQ. [Available from: <https://www.cehq.gouv.qc.ca/atlas-hydroclimatique/>]
11. CEHQ. [Available from: [https://www.cehq.gouv.qc.ca/hydrometrie/historique\\_donnees/fiche\\_station.asp?NoStation=031102](https://www.cehq.gouv.qc.ca/hydrometrie/historique_donnees/fiche_station.asp?NoStation=031102)]
12. Canada Weather Stats. [Available from: <https://xn--saintrmi-g1a.weatherstats.ca/>]
